# Supplementary material for: Nordic dietary patterns and cardiometabolic outcomes: a systematic review and meta-analysis of prospective cohort studies and randomised controlled trials
Source: PubMed Central journal article supplement (PMC9630197; doi:10.1007/s00125-022-05760-z), 2022-08-26
Supplement: 125_2022_5760_MOESM1_ESM.pdf [file 125_2022_5760_MOESM1_ESM.pdf]

## SUPPLEMENTARY TABLES AND FIGURES

|                                                                                                                                                                                            |    |
|--------------------------------------------------------------------------------------------------------------------------------------------------------------------------------------------|----|
| SUPPLEMENTARY TABLES .....                                                                                                                                                                 | 3  |
| ESM Table 1. PRISMA checklist. ....                                                                                                                                                        | 3  |
| ESM Table 2. Search strategy.....                                                                                                                                                          | 6  |
| ESM Table 3 Eligibility criteria for prospective cohort studies .....                                                                                                                      | 13 |
| ESM Table 4 PICOTS <sup>a</sup> framework for inclusion of randomized controlled trials .....                                                                                              | 13 |
| ESM Table 5. Characteristics of included cohorts.....                                                                                                                                      | 13 |
| ESM Table 6. Dietary scores used to assess adherence to the Nordic dietary pattern.....                                                                                                    | 16 |
| ESM Table 7. Confounding variables of included cohorts. ....                                                                                                                               | 18 |
| ESM Table 7. Confounding variables of included cohorts (continued).....                                                                                                                    | 19 |
| ESM Table 8. Newcastle-Ottawa Scale (NOS) scores of included cohorts.....                                                                                                                  | 20 |
| ESM Table 9. Selected sensitivity analyses in which the systematic removal of a cohort study altered the significance of the effect estimate or the evidence for heterogeneity.....        | 21 |
| ESM Table 10. Characteristics of included RCTs. ....                                                                                                                                       | 22 |
| ESM Table 11. Selected sensitivity analyses in which the systematic removal of an individual trial altered the significance of the effect estimate or the evidence for heterogeneity. .... | 24 |
| ESM Table 12. GRADE assessment for the association between Nordic dietary patterns and cardiometabolic disease outcomes for prospective cohort studies. ....                               | 25 |
| ESM Table 13 NutriGRADE Assessment for association of Nordic dietary patterns with cardiometabolic outcomes in Cohort studies. ....                                                        | 26 |
| ESM Table 14. GRADE assessment for the effect of Nordic dietary patterns and cardiometabolic risk factors in RCTs. ....                                                                    | 28 |
| ESM Table 15 NutriGRADE assessment for the effect of Nordic dietary patterns and cardiometabolic risk factors in RCTs.....                                                                 | 30 |
| SUPPLEMENTARY FIGURES .....                                                                                                                                                                | 32 |
| ESM Fig. 1. Forest plot of the association between the Nordic dietary patterns and CVD incidence.....                                                                                      | 32 |
| ESM Fig. 2. Forest plot of the association between the Nordic dietary patterns and CVD mortality. ....                                                                                     | 33 |
| ESM Fig. 3. Forest plot of the association between the Nordic dietary patterns and CHD incidence.....                                                                                      | 33 |
| ESM Fig. 4. Forest plot of the association between the Nordic dietary patterns and stroke incidence. ....                                                                                  | 34 |

|                                                                                                                                                        |    |
|--------------------------------------------------------------------------------------------------------------------------------------------------------|----|
| ESM Fig. 5. Forest plot of the association between the Nordic dietary patterns and type 2 diabetes mellitus incidence..                                | 34 |
| ESM Fig. 6. Risk of bias of included RCTs. ....                                                                                                        | 35 |
| ESM Fig. 7. Forest plot of randomized controlled trials assessing the effect of Nordic diets on LDL-C. ....                                            | 36 |
| ESM Fig. 8. Forest plot of randomized controlled trials assessing the effect of Nordic dietary patterns on BMI.....                                    | 36 |
| ESM Fig. 9. Forest plot of randomized controlled trials assessing the effect of Nordic dietary patterns on body weight. .                              | 37 |
| ESM Fig. 10. Forest plot of randomized controlled trials assessing the effect of Nordic dietary patterns on waist circumference.                       | 37 |
| ESM Fig. 11. Forest plot of randomized controlled trials assessing the effect of Nordic dietary patterns on HDL-C. ....                                | 38 |
| ESM Fig. 12. Forest plot of randomized controlled trials assessing the effect of Nordic dietary patterns on Non-HDL-C. .                               | 38 |
| ESM Fig. 13. Forest plot of randomized controlled trials assessing the effect of Nordic dietary patterns on triglycerides.                             | 39 |
| ESM Fig. 14. Forest plot of randomized controlled trials assessing the effect of Nordic dietary patterns on ApoB. ....                                 | 39 |
| ESM Fig. 15. Forest plot of randomized controlled trials assessing the effect of Nordic dietary patterns on systolic blood pressure.                   | 40 |
| ESM Fig. 16. Forest plot of randomized controlled trials assessing the effect of Nordic dietary patterns on diastolic blood pressure.                  | 40 |
| ESM Fig. 17. Forest plot of randomized controlled trials assessing the effect of Nordic dietary patterns on fasting blood glucose.                     | 41 |
| ESM Fig. 18. Forest plot of randomized controlled trials assessing the effect of Nordic dietary patterns on fasting blood insulin.                     | 41 |
| ESM Fig. 19. Forest plot of randomized controlled trials assessing the effect of Nordic dietary patterns on HbA1c.....                                 | 42 |
| ESM Fig. 20. Forest plot of randomized controlled trials assessing the effect of Nordic dietary patterns on inflammation.                              | 42 |
| ESM Fig. 21. Influence analysis plots of ad libitum randomized controlled trials assessing the effect of Nordic dietary patterns on adiposity markers. | 43 |

## SUPPLEMENTARY TABLES

**ESM Table 1. PRISMA checklist.**

| Section and Topic             | Item # | Checklist item                                                                                                                                                                                                                                                                                       | Location where item is reported     |
|-------------------------------|--------|------------------------------------------------------------------------------------------------------------------------------------------------------------------------------------------------------------------------------------------------------------------------------------------------------|-------------------------------------|
| <b>TITLE</b>                  |        |                                                                                                                                                                                                                                                                                                      |                                     |
| Title                         | 1      | Identify the report as a systematic review.                                                                                                                                                                                                                                                          | Page 1                              |
| <b>ABSTRACT</b>               |        |                                                                                                                                                                                                                                                                                                      |                                     |
| Abstract                      | 2      | See the PRISMA 2020 for Abstracts checklist.                                                                                                                                                                                                                                                         | Page 1                              |
| <b>INTRODUCTION</b>           |        |                                                                                                                                                                                                                                                                                                      |                                     |
| Rationale                     | 3      | Describe the rationale for the review in the context of existing knowledge.                                                                                                                                                                                                                          | Page 3                              |
| Objectives                    | 4      | Provide an explicit statement of the objective(s) or question(s) the review addresses.                                                                                                                                                                                                               | Page 3                              |
| <b>METHODS</b>                |        |                                                                                                                                                                                                                                                                                                      |                                     |
| Eligibility criteria          | 5      | Specify the inclusion and exclusion criteria for the review and how studies were grouped for the syntheses.                                                                                                                                                                                          | Page 3, Figure 1                    |
| Information sources           | 6      | Specify all databases, registers, websites, organisations, reference lists and other sources searched or consulted to identify studies. Specify the date when each source was last searched or consulted.                                                                                            | Page 3                              |
| Search strategy               | 7      | Present the full search strategies for all databases, registers and websites, including any filters and limits used.                                                                                                                                                                                 | Page 3, Supplementary Table 2       |
| Selection process             | 8      | Specify the methods used to decide whether a study met the inclusion criteria of the review, including how many reviewers screened each record and each report retrieved, whether they worked independently, and if applicable, details of automation tools used in the process.                     | Page 3                              |
| Data collection process       | 9      | Specify the methods used to collect data from reports, including how many reviewers collected data from each report, whether they worked independently, any processes for obtaining or confirming data from study investigators, and if applicable, details of automation tools used in the process. | Page 3                              |
| Data items                    | 10a    | List and define all outcomes for which data were sought. Specify whether all results that were compatible with each outcome domain in each study were sought (e.g. for all measures, time points, analyses), and if not, the methods used to decide which results to collect.                        | Page 3                              |
|                               | 10b    | List and define all other variables for which data were sought (e.g. participant and intervention characteristics, funding sources). Describe any assumptions made about any missing or unclear information.                                                                                         | Page 3<br>Supplementary Tables 5,10 |
| Study risk of bias assessment | 11     | Specify the methods used to assess risk of bias in the included studies, including details of the tool(s) used, how many reviewers assessed each study and whether they worked independently, and if applicable, details of automation tools used in the process.                                    | Page 3,4                            |
| Effect                        | 12     | Specify for each outcome the effect measure(s) (e.g. risk ratio, mean difference) used in the synthesis or presentation of                                                                                                                                                                           | Page 4                              |

| Section and Topic             | Item # | Checklist item                                                                                                                                                                                                                                                                       | Location where item is reported               |
|-------------------------------|--------|--------------------------------------------------------------------------------------------------------------------------------------------------------------------------------------------------------------------------------------------------------------------------------------|-----------------------------------------------|
| measures                      |        | results.                                                                                                                                                                                                                                                                             |                                               |
| Synthesis methods             | 13a    | Describe the processes used to decide which studies were eligible for each synthesis (e.g. tabulating the study intervention characteristics and comparing against the planned groups for each synthesis (item #5)).                                                                 | Page 4                                        |
|                               | 13b    | Describe any methods required to prepare the data for presentation or synthesis, such as handling of missing summary statistics, or data conversions.                                                                                                                                | Page 4                                        |
|                               | 13c    | Describe any methods used to tabulate or visually display results of individual studies and syntheses.                                                                                                                                                                               | Page 4                                        |
|                               | 13d    | Describe any methods used to synthesize results and provide a rationale for the choice(s). If meta-analysis was performed, describe the model(s), method(s) to identify the presence and extent of statistical heterogeneity, and software package(s) used.                          | Page 4                                        |
|                               | 13e    | Describe any methods used to explore possible causes of heterogeneity among study results (e.g. subgroup analysis, meta-regression).                                                                                                                                                 | Page 4                                        |
|                               | 13f    | Describe any sensitivity analyses conducted to assess robustness of the synthesized results.                                                                                                                                                                                         | Page 4                                        |
| Reporting bias assessment     | 14     | Describe any methods used to assess risk of bias due to missing results in a synthesis (arising from reporting biases).                                                                                                                                                              | Page 4                                        |
| Certainty assessment          | 15     | Describe any methods used to assess certainty (or confidence) in the body of evidence for an outcome.                                                                                                                                                                                | Page 4                                        |
| <b>RESULTS</b>                |        |                                                                                                                                                                                                                                                                                      |                                               |
| Study selection               | 16a    | Describe the results of the search and selection process, from the number of records identified in the search to the number of studies included in the review, ideally using a flow diagram.                                                                                         | Page 4                                        |
|                               | 16b    | Cite studies that might appear to meet the inclusion criteria, but which were excluded, and explain why they were excluded.                                                                                                                                                          | Page 4,8                                      |
| Study characteristics         | 17     | Cite each included study and present its characteristics.                                                                                                                                                                                                                            | Page 4,8                                      |
| Risk of bias in studies       | 18     | Present assessments of risk of bias for each included study.                                                                                                                                                                                                                         | Supplementary Table 8, Supplementary Figure 6 |
| Results of individual studies | 19     | For all outcomes, present, for each study: (a) summary statistics for each group (where appropriate) and (b) an effect estimate and its precision (e.g. confidence/credible interval), ideally using structured tables or plots.                                                     | Table 1, 2<br>Figure 1, 2                     |
| Results of syntheses          | 20a    | For each synthesis, briefly summarise the characteristics and risk of bias among contributing studies.                                                                                                                                                                               | Page 8,12                                     |
|                               | 20b    | Present results of all statistical syntheses conducted. If meta-analysis was done, present for each the summary estimate and its precision (e.g. confidence/credible interval) and measures of statistical heterogeneity. If comparing groups, describe the direction of the effect. | Figure 1, 2                                   |
|                               | 20c    | Present results of all investigations of possible causes of heterogeneity among study results.                                                                                                                                                                                       | Page 9,12                                     |
|                               | 20d    | Present results of all sensitivity analyses conducted to assess the robustness of the synthesized results.                                                                                                                                                                           | Page 8,12                                     |
| Reporting biases              | 21     | Present assessments of risk of bias due to missing results (arising from reporting biases) for each synthesis assessed.                                                                                                                                                              | Page 13                                       |

| Section and Topic                              | Item # | Checklist item                                                                                                                                                                                                                             | Location where item is reported |
|------------------------------------------------|--------|--------------------------------------------------------------------------------------------------------------------------------------------------------------------------------------------------------------------------------------------|---------------------------------|
| Certainty of evidence                          | 22     | Present assessments of certainty (or confidence) in the body of evidence for each outcome assessed.                                                                                                                                        | Page 13                         |
| <b>DISCUSSION</b>                              |        |                                                                                                                                                                                                                                            |                                 |
| Discussion                                     | 23a    | Provide a general interpretation of the results in the context of other evidence.                                                                                                                                                          | Page 13                         |
|                                                | 23b    | Discuss any limitations of the evidence included in the review.                                                                                                                                                                            | Page 14                         |
|                                                | 23c    | Discuss any limitations of the review processes used.                                                                                                                                                                                      | Page 14                         |
|                                                | 23d    | Discuss implications of the results for practice, policy, and future research.                                                                                                                                                             | Page 14                         |
| <b>OTHER INFORMATION</b>                       |        |                                                                                                                                                                                                                                            |                                 |
| Registration and protocol                      | 24a    | Provide registration information for the review, including register name and registration number, or state that the review was not registered.                                                                                             | Page 3                          |
|                                                | 24b    | Indicate where the review protocol can be accessed, or state that a protocol was not prepared.                                                                                                                                             | Page 3                          |
|                                                | 24c    | Describe and explain any amendments to information provided at registration or in the protocol.                                                                                                                                            | NA                              |
| Support                                        | 25     | Describe sources of financial or non-financial support for the review, and the role of the funders or sponsors in the review.                                                                                                              | Page 15                         |
| Competing interests                            | 26     | Declare any competing interests of review authors.                                                                                                                                                                                         | Page 15                         |
| Availability of data, code and other materials | 27     | Report which of the following are publicly available and where they can be found: template data collection forms; data extracted from included studies; data used for all analyses; analytic code; any other materials used in the review. | Page 15                         |

**ESM Table 2. Search strategy.**

|    | <i><b>MEDLINE</b></i>                             |    | <i><b>EMBASE</b></i>                              |    | <i><b>The<br/>Cochrane<br/>library</b></i>        |
|----|---------------------------------------------------|----|---------------------------------------------------|----|---------------------------------------------------|
|    | <b>Through<br/>March 9<sup>th</sup>,<br/>2021</b> |    | <b>Through<br/>March 9<sup>th</sup>,<br/>2021</b> |    | <b>Through<br/>March 9<sup>th</sup>,<br/>2021</b> |
| 1  | Diet,<br>Scandinavian/                            | 1  | Diet,<br>Scandinavian/                            | 1  | (Scandinavian<br>adj3 diet).mp.                   |
| 2  | (Scandinavian<br>adj3 diet).mp.                   | 2  | (Scandinavian<br>adj3 diet).mp.                   | 2  | Scandinavian<br>diet*.mp.                         |
| 3  | Scandinavian<br>diet*.mp.                         | 3  | Scandinavian<br>diet*.mp.                         | 3  | (Baltic sea adj3<br>diet).mp.                     |
| 4  | Diet, Baltic sea/                                 | 4  | Diet, Baltic sea/                                 | 4  | Baltic sea<br>diet*.mp.                           |
| 5  | (Baltic sea adj3<br>diet).mp.                     | 5  | (Baltic sea adj3<br>diet).mp.                     | 5  | (Finnish adj3<br>diet).mp.                        |
| 6  | Baltic sea<br>diet*.mp.                           | 6  | Baltic sea<br>diet*.mp.                           | 6  | Finnish<br>diet*.mp.                              |
| 7  | Diet, Finnish/                                    | 7  | Diet, Finnish/                                    | 7  | (Danish adj3<br>diet).mp.                         |
| 8  | (Finnish adj3<br>diet).mp.                        | 8  | (Finnish adj3<br>diet).mp.                        | 8  | Danish<br>diet*.mp.                               |
| 9  | Finnish<br>diet*.mp.                              | 9  | Finnish<br>diet*.mp.                              | 9  | (Swedish adj3<br>diet).mp.                        |
| 10 | Diet, Danish/                                     | 10 | Diet, Danish/                                     | 10 | Swedish<br>diet*.mp.                              |
| 11 | (Danish adj3<br>diet).mp.                         | 11 | (Danish adj3<br>diet).mp.                         | 11 | (Icelandic adj3<br>diet).mp.                      |
| 12 | Danish<br>diet*.mp.                               | 12 | Danish<br>diet*.mp.                               | 12 | Icelandic<br>diet*.mp.                            |
| 13 | Diet, Swedish/                                    | 13 | Diet, Swedish/                                    | 13 | (Nordic adj3<br>diet).mp.                         |
| 14 | (Swedish adj3<br>diet).mp.                        | 14 | (Swedish adj3<br>diet).mp.                        | 14 | Nordic<br>diet*.mp.                               |
| 15 | Swedish<br>diet*.mp.                              | 15 | Swedish<br>diet*.mp.                              | 15 | (Malmo adj3<br>diet).mp.                          |
| 16 | Diet, Icelandic/                                  | 16 | Diet, Icelandic/                                  | 16 | Malmo<br>diet*.mp.                                |
| 17 | (Icelandic adj3<br>diet).mp.                      | 17 | (Icelandic adj3<br>diet).mp.                      | 17 | (Sami adj3<br>diet).mp.                           |
| 18 | Icelandic<br>diet*.mp.                            | 18 | Icelandic<br>diet*.mp.                            | 18 | Sami diet*.mp.                                    |
| 19 | Diet, Nordic/                                     | 19 | Diet, Nordic/                                     | 19 | (Norwegian<br>adj3 diet).mp.                      |
| 20 | (Nordic adj3<br>diet).mp.                         | 20 | (Nordic adj3<br>diet).mp.                         | 20 | Norwegian<br>diet*.mp.                            |
| 21 | Nordic<br>diet*.mp.                               | 21 | Nordic<br>diet*.mp.                               | 21 | (Faroese islands<br>adj3 diet).mp.                |
| 22 | Diet, Malmo /                                     | 22 | Diet, Malmo /                                     | 22 | Faroese islands<br>diet*.mp.                      |
| 23 | (Malmo adj3<br>diet).mp.                          | 23 | (Malmo adj3<br>diet).mp.                          | 23 | or/1-22                                           |
| 24 | Malmo<br>diet*.mp.                                | 24 | Malmo<br>diet*.mp.                                | 24 | Stroke/                                           |
| 25 | Diet, Faroese<br>islands/                         | 25 | Diet, Faroese<br>islands/                         | 25 | stroke.mp.                                        |

|    |                                            |    |                                                |    |                                            |
|----|--------------------------------------------|----|------------------------------------------------|----|--------------------------------------------|
| 26 | (Faroese islands<br>adj3 diet).mp.         | 26 | (Faroese islands<br>adj3 diet).mp.             | 26 | cerebrovascular<br>accident.mp.            |
| 27 | Faroese islands<br>diet*.mp.               | 27 | Faroese islands<br>diet*.mp.                   | 27 | (fatal adj3<br>stroke).mp.                 |
| 28 | (Sami adj3<br>diet).mp.                    | 28 | (Sami adj3<br>diet).mp.                        | 28 | Cerebral<br>Hemorrhage/                    |
| 29 | Sami diet*.mp.                             | 29 | Sami diet*.mp.                                 | 29 | hemorrhagic<br>stroke.mp.                  |
| 30 | Diet, Sami/                                | 30 | Diet, Sami/                                    | 30 | Intracranial<br>Hemorrhages/               |
| 31 | (Norwegian<br>adj3 diet).mp.               | 31 | (Norwegian<br>adj3 diet).mp.                   | 31 | Brain Ischemia/                            |
| 32 | Norwegian<br>diet*.mp.                     | 32 | Norwegian<br>diet*.mp.                         | 32 | brain<br>ischemia.mp.                      |
| 33 | Diet,<br>Norwegian/                        | 33 | Diet,<br>Norwegian/                            | 33 | Cerebral<br>Infarction/                    |
| 34 | or/1-33                                    | 34 | or/1-33                                        | 34 | Peripheral<br>Arterial<br>Disease/         |
| 35 | exp Stroke/                                | 35 | exp<br>cerebrovascular<br>accident/            | 35 | peripheral<br>arterial<br>disease.mp.      |
| 36 | (fatal adj3<br>stroke).mp.                 | 36 | stroke.mp.                                     | 36 | Heart Failure/                             |
| 37 | non fatal<br>stroke.mp.                    | 37 | (fatal adj3<br>stroke).mp.                     | 37 | Myocardial<br>Ischemia/                    |
| 38 | hemorrhagic<br>stroke.mp.                  | 38 | non fatal<br>stroke.mp.                        | 38 | myocardial<br>ischemia.mp.                 |
| 39 | exp Intracranial<br>Hemorrhages/           | 39 | hemorrhagic<br>stroke.mp.                      | 39 | Myocardial<br>Infarction/                  |
| 40 | exp Intracranial<br>arterial diseases/     | 40 | exp brain<br>hemorrhage/                       | 40 | myocardial<br>infarction.mp.               |
| 41 | ischemic<br>stroke.mp.                     | 41 | intracranial<br>hemorrhage.mp.                 | 41 | cardiovascular<br>disease<br>mortality.mp. |
| 42 | exp Brain<br>Ischemia/                     | 42 | exp cerebral<br>artery disease/                | 42 | cardiovascular<br>disease<br>death.mp.     |
| 43 | exp Cerebral<br>Infarction/                | 43 | intracranial<br>arterial<br>disease.mp.        | 43 | CVD<br>mortality.mp.                       |
| 44 | exp Peripheral<br>Arterial<br>Disease/     | 44 | ischemic<br>stroke.mp.                         | 44 | Cardiovascular<br>Diseases/                |
| 45 | peripheral artery<br>disease.mp.           | 45 | exp brain<br>ischemia/                         | 45 | cardiovascular<br>disease.mp.              |
| 46 | exp heart<br>failure/                      | 46 | exp brain<br>infarction/                       | 46 | CVD.mp.                                    |
| 47 | heart failure.mp.                          | 47 | exp peripheral<br>occlusive artery<br>disease/ | 47 | Coronary<br>Disease/                       |
| 48 | exp myocardial<br>ischemia/                | 48 | peripheral artery<br>disease.mp.               | 48 | coronary<br>disease.mp.                    |
| 49 | exp myocardial<br>infarction/              | 49 | exp heart<br>failure/                          | 49 | cerebrovascular.<br>mp.                    |
| 50 | cardiovascular<br>disease<br>mortality.mp. | 50 | heart failure.mp.                              | 50 | OGTT.mp.                                   |
| 51 | cardiovascular<br>disease                  | 51 | exp heart<br>muscle                            | 51 | oral glucose<br>tolerance                  |

|    |                                        |    |                                            |    |                                                    |
|----|----------------------------------------|----|--------------------------------------------|----|----------------------------------------------------|
| 52 | death.mp.<br>CVD death.mp.             | 52 | ischemia/<br>exp heart<br>infarction/      | 52 | test'.mp.<br>exp<br>Hemoglobin A,<br>Glycosylated/ |
| 53 | CVD<br>mortality.mp.                   | 53 | cardiovascular<br>disease<br>mortality.mp. | 53 | hba1c.mp.                                          |
| 54 | cardiovascular<br>disease.mp.          | 54 | cardiovascular<br>disease<br>death.mp.     | 54 | insulin*.mp.                                       |
| 55 | exp<br>cardiovascular<br>disease/      | 55 | CVD<br>mortality.mp.                       | 55 | glycemia.mp.                                       |
| 56 | CVD.mp.                                | 56 | CVD death.mp.                              | 56 | exp Glucose/                                       |
| 57 | coronary<br>disease.mp.                | 57 | cardiovascular<br>disease.mp.              | 57 | exp<br>Hyperglycemia/                              |
| 58 | exp Coronary<br>Disease/               | 58 | exp<br>cardiovascular<br>disease/          | 58 | hyperinsulin*.m<br>p.                              |
| 59 | cerebrovascular.<br>mp.                | 59 | CVD.mp.                                    | 59 | dysglycemia.mp<br>.                                |
| 60 | cerebral<br>vascular.mp.               | 60 | coronary<br>disease.mp.                    | 60 | exp diabetes<br>mellitus/                          |
| 61 | OGTT.mp.                               | 61 | exp coronary<br>artery disease/            | 61 | metabolic<br>syndrome.mp.                          |
| 62 | exp<br>Hemoglobin A,<br>Glycosylated / | 62 | cerebrovascular.<br>mp.                    | 62 | exp Body<br>Weight/                                |
| 63 | hba1c.mp.                              | 63 | cerebral<br>vascular.mp.                   | 63 | body<br>weight*.mp.                                |
| 64 | insulin*.mp.                           | 64 | exp oral glucose<br>tolerance test/        | 64 | exp Body Mass<br>Index/                            |
| 65 | glycemia.mp.                           | 65 | OGTT.mp.                                   | 65 | body mass<br>index.mp.                             |
| 66 | exp Glucose/                           | 66 | exp hemoglobin<br>A1c/                     | 66 | BMI.mp.                                            |
| 67 | exp<br>Hyperglycemia/                  | 67 | hba1c.mp.                                  | 67 | exp Waist<br>Circumference/                        |
| 68 | hyperinsulin*.m<br>p.                  | 68 | insulin*.mp.                               | 68 | waist<br>circumference.<br>mp.                     |
| 69 | dysglycemia.mp<br>.                    | 69 | exp glucose<br>blood level/                | 69 | exp overweight/                                    |
| 70 | exp diabetes<br>mellitus/              | 70 | glycemia.mp.                               | 70 | overweight.mp.                                     |
| 71 | metabolic<br>syndrome.mp.              | 71 | exp glucose/                               | 71 | exp Obesity/                                       |
| 72 | exp Body<br>Weight/                    | 72 | 'impaired<br>fasting<br>glucose'.mp.       | 72 | exp Obesity,<br>Abdominal/                         |
| 73 | body<br>weight*.tw.                    | 73 | hyperglycemia.<br>mp.                      | 73 | exp Obesity,<br>Morbid/                            |
| 74 | exp Body Mass<br>Index/                | 74 | 'impaired<br>glucose<br>tolerance'.mp.     | 74 | obesity.mp.                                        |
| 75 | body mass<br>index.tw.                 | 75 | hyperinsulin*.m<br>p.                      | 75 | body fat.mp.                                       |
| 76 | BMI.tw.                                | 76 | dysglycemia.mp<br>.                        | 76 | hypertension.m<br>p.                               |
| 77 | exp Waist                              | 77 | exp diabetes                               | 77 | blood                                              |



|    |                                                                                                           |    |                                                                                                                                                                                                                                                 |    |                                                                                                                                                       |
|----|-----------------------------------------------------------------------------------------------------------|----|-------------------------------------------------------------------------------------------------------------------------------------------------------------------------------------------------------------------------------------------------|----|-------------------------------------------------------------------------------------------------------------------------------------------------------|
| 78 | Circumference/<br>waist<br>circumference.t<br>w.                                                          | 78 | mellitus/<br>exp insulin<br>dependent<br>diabetes<br>mellitus/<br>exp non insulin<br>dependent<br>diabetes<br>mellitus/<br>exp pregnancy<br>diabetes<br>mellitus/<br>exp metabolic<br>syndrome X/<br>exp Body<br>Weight/<br>body<br>weight*.tw. | 78 | pressure.mp.<br>systolic blood<br>pressure.mp.                                                                                                        |
| 79 | exp overweight/<br>overweight.tw.                                                                         | 79 |                                                                                                                                                                                                                                                 | 79 | diastolic blood<br>pressure.mp.                                                                                                                       |
| 80 | exp Obesity/<br>exp Obesity,<br>Abdominal/<br>exp Obesity,<br>Morbid/<br>obesity.tw.                      | 80 |                                                                                                                                                                                                                                                 | 80 | hypertension.m<br>p.                                                                                                                                  |
| 81 | exp Obesity,<br>Abdominal/<br>exp Obesity,<br>Morbid/<br>obesity.tw.                                      | 81 |                                                                                                                                                                                                                                                 | 81 | SBP.mp.                                                                                                                                               |
| 82 | exp Obesity,<br>Abdominal/<br>exp Obesity,<br>Morbid/<br>obesity.tw.                                      | 82 |                                                                                                                                                                                                                                                 | 82 | DBP.mp.                                                                                                                                               |
| 83 | exp Obesity,<br>Abdominal/<br>exp Obesity,<br>Morbid/<br>obesity.tw.                                      | 83 |                                                                                                                                                                                                                                                 | 83 | exp<br>lipoproteins/ or<br>exp cholesterol/<br>or exp<br>hyperlipidemias<br>/ or (lipid or<br>lipids).mp.<br>(cholesterol or<br>cholesterols).mp<br>. |
| 84 | obesity.tw.                                                                                               | 84 | exp Body Mass<br>Index/<br>body fat.tw.                                                                                                                                                                                                         | 84 | hdl.mp.                                                                                                                                               |
| 85 | body fat.tw.                                                                                              | 85 | body mass<br>index.tw.                                                                                                                                                                                                                          | 85 |                                                                                                                                                       |
| 86 | exp<br>Hypertension/<br>Blood Pressure/<br>"diastolic blood<br>pressure".mp.                              | 86 | BMI.tw.                                                                                                                                                                                                                                         | 86 | ("high density<br>lipoprotein" or<br>"high density<br>lipoproteins").m<br>p.<br>ldl.mp.                                                               |
| 87 | Blood Pressure/<br>"diastolic blood<br>pressure".mp.                                                      | 87 | exp Waist<br>Circumference/<br>waist<br>circumference.t<br>w.                                                                                                                                                                                   | 87 |                                                                                                                                                       |
| 88 | "diastolic blood<br>pressure".mp.                                                                         | 88 |                                                                                                                                                                                                                                                 | 88 | ("low density<br>lipoprotein" or<br>"low density<br>lipoproteins").m<br>p.<br>(hyperlipemia*<br>or<br>hyperlipaemia*)<br>.mp.                         |
| 89 | "systolic blood<br>pressure".mp.                                                                          | 89 | exp<br>Overweight/<br>overweight.tw.                                                                                                                                                                                                            | 89 | (hyperlipemia*<br>or<br>hyperlipaemia*)<br>.mp.                                                                                                       |
| 90 | hypertension.m<br>p.                                                                                      | 90 |                                                                                                                                                                                                                                                 | 90 | (hyperlipidemia<br>* or<br>hyperlipidaemia<br>*).mp.                                                                                                  |
| 91 | SBP.mp.                                                                                                   | 91 | exp Obesity/<br>exp Obesity,<br>Abdominal/<br>exp Obesity,<br>Morbid/<br>exp lipoproteins/ or<br>exp cholesterol/<br>or exp<br>hyperlipidemias<br>/ or (lipid or<br>lipids).mp.                                                                 | 91 | (lipidemia* or<br>lipidaemia*).mp<br>.                                                                                                                |
| 92 | DBP.mp.                                                                                                   | 92 |                                                                                                                                                                                                                                                 | 92 | (lipemia* or<br>lipaemia*).mp.                                                                                                                        |
| 93 | exp<br>lipoproteins/ or<br>exp cholesterol/<br>or exp<br>hyperlipidemias<br>/ or (lipid or<br>lipids).mp. | 93 |                                                                                                                                                                                                                                                 | 93 | (lipemic or<br>lipaemic).mp.                                                                                                                          |

|     |                                                                 |     |                                                                                         |     |                          |
|-----|-----------------------------------------------------------------|-----|-----------------------------------------------------------------------------------------|-----|--------------------------|
| 94  | (cholesterol or cholesterols).mp                                | 94  | obesity.tw.                                                                             | 94  | triglycerides.mp         |
| 95  | hdl.mp.                                                         | 95  | body fat.tw.                                                                            | 95  | hypertriglyceridemia.mp. |
| 96  | ("high density lipoprotein" or "high density lipoproteins").mp. | 96  | exp Hypertension/                                                                       | 96  | TG.mp.                   |
| 97  | ldl.mp.                                                         | 97  | exp Blood Pressure/                                                                     | 97  | triacylglycerol*.mp.     |
| 98  | ("low density lipoprotein" or "low density lipoproteins").mp.   | 98  | "systolic blood pressure".mp.                                                           | 98  | TAG.mp.                  |
| 99  | (hyperlipemia* or hyperlipaemia*) .mp.                          | 99  | "diastolic blood pressure".mp.                                                          | 99  | dyslipidemia.mp.         |
| 100 | (hyperlipidemia* or hyperlipidaemia*) .mp.                      | 100 | SBP.mp.                                                                                 | 100 | Inflamm*.mp              |
| 101 | (lipidemia* or lipidaemia*) .mp.                                | 101 | DBP.mp.                                                                                 | 101 | C-reactive protein.mp    |
| 102 | (lipemia* or lipaemia*) .mp.                                    | 102 | (cholesterol or cholesterols).mp                                                        | 102 | CRP.mp                   |
| 103 | (lipemic or lipaemic).mp.                                       | 103 | hdl.mp.                                                                                 | 103 | or/24-103                |
| 104 | exp Triglycerides/                                              | 104 | exp lipoproteins/ or exp cholesterol/ or exp hyperlipidemias / or (lipid or lipids).mp. |     |                          |
| 105 | triglyceride*.mp                                                | 105 | ("high density lipoprotein" or "high density lipoproteins").mp.                         |     |                          |
| 106 | hypertriglyceridemia*.mp.                                       | 106 | ldl.mp.                                                                                 |     |                          |
| 107 | exp Hypertriglyceridemia/                                       | 107 | ("low density lipoprotein" or "low density lipoproteins").mp.                           |     |                          |
| 108 | exp Dyslipidemias/                                              | 108 | (hyperlipemia* or hyperlipaemia*) .mp.                                                  |     |                          |
| 109 | triacylglycerol*.mp.                                            | 109 | (hyperlipidemia* or hyperlipidaemia*) .mp.                                              |     |                          |

|     |                                                                                                                                                     |     |                                 |
|-----|-----------------------------------------------------------------------------------------------------------------------------------------------------|-----|---------------------------------|
| 110 | dyslipidaemia*.mp.                                                                                                                                  | 110 | (lipidemia* or lipidaemia*).mp. |
| 111 | dyslipidemia.m p.                                                                                                                                   | 111 | (lipemia* or lipaemia*).mp.     |
| 112 | Inflamm*.mp                                                                                                                                         | 112 | (lipemic or lipaemic).mp.       |
| 113 | C-reactive protein.mp                                                                                                                               | 113 | exp Triglycerides/              |
| 114 | CRP.mp                                                                                                                                              | 114 | exp Hypertriglyceridemia/       |
| 115 | or/35-114                                                                                                                                           | 115 | hypertriglyceridemia*.mp.       |
| 116 | exp cohort studies/                                                                                                                                 | 116 | triglyceride*.mp.               |
| 117 | cohort\$.tw.                                                                                                                                        | 117 | triacylglycerol*.mp.            |
| 118 | controlled clinical trial.pt.                                                                                                                       | 118 | dyslipidemia*.mp.               |
| 119 | epidemiologic methods/                                                                                                                              | 119 | dyslipidaemia*.mp.              |
| 120 | limit 35 to yr=1971-1988                                                                                                                            | 120 | exp Dyslipidemias/              |
| 121 | 116 or 117 or 118 or 120                                                                                                                            | 121 | Inflamm*.mp                     |
| 122 | 34 and 115 and 121                                                                                                                                  | 122 | C-reactive protein.mp           |
| 123 | "randomized controlled trial".pt.                                                                                                                   | 123 | CRP.mp                          |
| 124 | (random\$ or placebo\$ or single blind\$ or double blind\$ or triple blind\$).ti,ab.                                                                | 124 | or/35-123                       |
| 125 | (retraction of publication or retracted publication).pt.                                                                                            | 125 | exp cohort analysis/            |
| 126 | 123 or 124 or 125                                                                                                                                   | 126 | exp longitudinal study/         |
| 127 | (animals not humans).sh.                                                                                                                            | 127 | exp prospective study/          |
| 128 | ((comment or editorial or meta-analysis or practice-guideline or review or letter or journal correspondence) not "randomized controlled trial").pt. | 128 | exp follow up/                  |
| 129 | (random sampl\$ or random digit\$ or random                                                                                                         | 129 | cohort\$.tw.                    |

|     |                                                                                               |     |                                                                                                                                          |
|-----|-----------------------------------------------------------------------------------------------|-----|------------------------------------------------------------------------------------------------------------------------------------------|
|     | effect\$ or random survey or random regression).ti, ab. not "randomized controlled trial".pt. |     |                                                                                                                                          |
| 130 | 126 not (127 or 128 or 129)                                                                   | 130 | 125 or 126 or 127 or 128 or 129                                                                                                          |
| 131 | 34 and 115 and 128                                                                            | 131 | 34 and 123 and 130                                                                                                                       |
| 132 | 121 or 131                                                                                    | 132 | (random\$ or placebo\$ or single blind\$ or double blind\$ or triple blind\$).ti,ab.                                                     |
|     |                                                                                               | 133 | RETRACTED ARTICLE/                                                                                                                       |
|     |                                                                                               | 134 | 131 or 133                                                                                                                               |
|     |                                                                                               | 135 | (animal\$ not human\$).sh,h w.                                                                                                           |
|     |                                                                                               | 136 | (book or conference paper or editorial or letter or review).pt. not exp randomized controlled trial/                                     |
|     |                                                                                               | 137 | (random sampl\$ or random digit\$ or random effect\$ or random survey or random regression).ti, ab. not exp randomized controlled trial/ |
|     |                                                                                               | 138 | 133 not (135 or 136 or 137)                                                                                                              |
|     |                                                                                               | 139 | 34 and 123 and 138                                                                                                                       |
|     |                                                                                               | 140 | 131 or 139                                                                                                                               |

**ESM Table 3. Eligibility criteria for prospective cohort studies**

| <b>Participants</b>                                                      | <b>Inclusion criteria</b>                                                                                                                                                                                                                       | <b>Exclusion criteria</b>                                                                                                                                                                                                                                                                                                                      | <b>Outcome</b>                                                                       |
|--------------------------------------------------------------------------|-------------------------------------------------------------------------------------------------------------------------------------------------------------------------------------------------------------------------------------------------|------------------------------------------------------------------------------------------------------------------------------------------------------------------------------------------------------------------------------------------------------------------------------------------------------------------------------------------------|--------------------------------------------------------------------------------------|
| All individuals, both children, and adults, regardless of health status. | <ul style="list-style-type: none"> <li>• Prospective cohort studies</li> <li>• Duration <math>\geq</math> 1 year</li> <li>• Assessment of the exposure of a Nordic Diet</li> <li>• Ascertainment of viable data by level of exposure</li> </ul> | <ul style="list-style-type: none"> <li>• Ecological, cross-sectional, retrospective observational studies, clinical trials, and non-human studies</li> <li>• Duration <math>&lt;</math> 1 year</li> <li>• non assessment of exposure of a Nordic diet</li> <li>• No ascertainment viable clinical outcome data by level of exposure</li> </ul> | Cardiovascular Diseases<br>Coronary Heart Disease<br>Stroke<br>Mortality<br>Diabetes |

**ESM Table 4. PICOTS<sup>a</sup> framework for inclusion of randomized controlled trials**

| <b>Participants</b>                                                      | <b>Intervention</b>       | <b>Comparison</b>                 | <b>Outcome</b>                                                                             | <b>Time</b>    | <b>Study Design</b>                |
|--------------------------------------------------------------------------|---------------------------|-----------------------------------|--------------------------------------------------------------------------------------------|----------------|------------------------------------|
| All individuals, both children, and adults, regardless of health status. | Nordic diets intervention | Habitual or usual or western diet | Adiposity, glycemic control, established blood lipid targets, blood pressure, inflammation | $\geq$ 3 weeks | Human randomized controlled trials |

<sup>a</sup> Population, Intervention, Comparator, Outcome, Time, and Study design

**ESM Table 5. Characteristics of included cohorts.**

| Study, year                  | Cohort                                           | Sex   | Population*                 | Country                                                                                                 | Ethnicity | N       | Cases            | Age                | Follow-up (years)       | Mean Follow-up (years) | Method of Measurement of Exposure                                          | Quantile divisions (score division)                    | Nordic diet index                    | Outcome          | Funding Sources |
|------------------------------|--------------------------------------------------|-------|-----------------------------|---------------------------------------------------------------------------------------------------------|-----------|---------|------------------|--------------------|-------------------------|------------------------|----------------------------------------------------------------------------|--------------------------------------------------------|--------------------------------------|------------------|-----------------|
| Gunge et al. 2017            | Danish Diet, Cancer and Health cohort            | M     | Free of cancer              | Denmark                                                                                                 | Caucasian | 25,759  | 1,669            | 50-64 <sup>a</sup> | 1993-2009               | 13.6                   | 192-item SFFQ                                                              | Category, (0,1,2,3,4,5, 6)                             | HNFI                                 | CHD incidence    | A               |
|                              |                                                  | F     |                             |                                                                                                         |           | 28,809  | 653              |                    |                         |                        |                                                                            |                                                        |                                      |                  |                 |
| Warensjö Lemming et al. 2018 | Swedish Mammography Cohort                       | F     | General                     | Sweden                                                                                                  | Caucasian | 33,341  | 3003             | 61 <sup>b</sup>    | 1997-2014               | 17                     | 96-item FFQ                                                                | Tertiles (0-1, 2-4,5-6)                                | HNFI                                 | CVD mortality    | A               |
| Tertsunen et al. 2020        | Kuopio Ischaemic Heart Disease Risk Factor Study | M     | General                     | Finland                                                                                                 | Caucasian | 1547    | 250              | 42-60 <sup>a</sup> | 1984-1989, 2014         | 23.6 <sup>a</sup>      | Dietary records 4-day                                                      | Tertiles (0-1, 2-4,5-6)                                | Modified Baltic Sea Diet Score       | CVD mortality    | A               |
| Lacoppidan et al. 2015       | Danish Diet, Cancer and Health cohort            | M     | Free of cancer              | Denmark                                                                                                 | Caucasian | 26,107  | 4097             | 50-64 <sup>a</sup> | 1993-1997,2011          | 15.3 <sup>a</sup>      | 192-item SFFQ                                                              | Category, (0,1,2,3,4,5, 6)                             | HNFI                                 | T2DM             | A               |
|                              |                                                  | F     |                             |                                                                                                         |           | 28,953  | 3269             |                    |                         |                        |                                                                            |                                                        |                                      |                  |                 |
| Ewers et al. 2020            | The Copenhagen General Population Study          | M + F | General                     | Denmark                                                                                                 | Caucasian | 88,818  | 2982             | 58 <sup>b</sup>    | 2003-2015,2018          | 9.2                    | Short FFQ                                                                  | Quantiles (Very high/High, Intermediate, Very Low/Low) | Danish food-based dietary guidelines | CVD mortality    | A               |
| Lassale et al. 2016          | EPIC                                             | M + F | Free of cancer and diabetes | Denmark, France, Germany, Greece, Italy, the Netherlands, Norway, Spain, Sweden, and the United Kingdom | Caucasian | 451,256 | 3761             | 25-70 <sup>a</sup> | Recruit 1992 - 2000     | 12.8                   | Dietary questionnaires (validation with 24h recalls, FFQ, dietary records) | Quantiles (0,1,2,3,4,5, 6)                             | HNFI                                 | CVD mortality    | A               |
| Drake et al. 2013            | Malmö Diet and Cancer cohort                     | M     | Free of diabetes            | Sweden                                                                                                  | Caucasian | 6940    | 444              | 45-73 <sup>a</sup> | Recruit 1991-1996, 2008 | 14.2 <sup>a</sup>      | 7-d food diary, 168-item FFQ, diet history interview                       | Tertiles (0-1, 2-3,4-6)                                | DQI-SNR                              | CVD mortality    | A               |
|                              |                                                  | F     |                             |                                                                                                         |           | 10,186  | 265              | 44-73 <sup>a</sup> |                         |                        |                                                                            |                                                        |                                      |                  |                 |
| Hansen et al. 2017           | Danish Diet, Cancer and Health cohort            | M + F | Free of cancer              | Denmark                                                                                                 | Caucasian | 55,338  | 2283             | 56.1 <sup>b</sup>  | Recruit 1993-1997       | 13.5                   | 192-tem SFFQ                                                               | Tertiles (0-1, 2-3,4-6)                                | HNFI                                 | Stroke incidence | A               |
| Hlebowicz et al. 2013        | Malmö Diet and Cancer cohort                     | M     | Free of diabetes            | Sweden                                                                                                  | Caucasian | 6940    | 1093             | 45-73 <sup>a</sup> | 1991-2008               | 14 <sup>a</sup>        | 7-d food diary, 168-item FFQ, diet history interview                       | Tertiles (0-1, 2-3,4-6)                                | DQI-SNR                              | CVD incidence    | A               |
|                              |                                                  | F     |                             |                                                                                                         |           | 10,186  | 703              | 44-74 <sup>a</sup> |                         |                        |                                                                            |                                                        |                                      |                  |                 |
| Roswall et al. 2015          | Swedish Women's Lifestyle and Health Cohort      | F     | General                     | Sweden                                                                                                  | Caucasian | 43,310  | 8383             | 29-49 <sup>a</sup> | 1991-1992,2012          | 21.3                   | 80-item FFQ, 7-day records in 129 women                                    | Tertiles (0-1, 2-3,4-6)                                | HNFI                                 | CVD incidence    | A               |
|                              |                                                  |       |                             |                                                                                                         |           | 698     | Stroke incidence |                    |                         |                        |                                                                            |                                                        |                                      |                  |                 |

|                       |                                                      |       |                             |         |           |                   |       |                    |                 |                   |                                                      |                            |                       |                 |     |                  |
|-----------------------|------------------------------------------------------|-------|-----------------------------|---------|-----------|-------------------|-------|--------------------|-----------------|-------------------|------------------------------------------------------|----------------------------|-----------------------|-----------------|-----|------------------|
|                       |                                                      |       |                             |         |           |                   | 1019  |                    |                 |                   |                                                      |                            |                       | CHD incidence   |     |                  |
| Roswall et al. 2015   | Swedish Women's Lifestyle and Health Cohort          | F     | General                     | Sweden  | Caucasian | 44,961            | 270   | 29-49 <sup>a</sup> | 1991-1992,2012  | 21.3              | 80-item FFQ, 7-day records in 129 women              | Tertiles (0-1, 2-3,4-6)    | HNFI                  | CVD mortality   | A   |                  |
| Kanerva et al. 2014   | Helsinki Birth Cohort Study                          | M + F | Free of diabetes            | Denmark | Caucasian | 6744              | 541   | 47-62 <sup>a</sup> | 2000-2010       | 9.4 <sup>a</sup>  | 128-item FFQ                                         | Quantiles (0-25)           | Baltic Sea Diet Score | T2DM            | A+I |                  |
|                       |                                                      |       |                             |         |           | 11.3 <sup>a</sup> |       |                    |                 |                   |                                                      |                            |                       |                 |     |                  |
| Mandalazi et al. 2016 | Malmö Diet and Cancer cohort                         | M     | Free of diabetes            | Sweden  | Caucasian | 26,868            | 1,859 | 44-74 <sup>a</sup> | 1991-1996,2014  | 17 <sup>a</sup>   | 7-d food diary, 168-item FFQ, diet history interview | Tertiles (0-1, 2-4,5-6)    | DQI-SNR               | T2DM            | A   |                  |
|                       |                                                      | F     |                             |         |           | 1,979             |       |                    |                 |                   |                                                      |                            |                       |                 |     |                  |
| Galbete et al. 2018   | EPIC-Potsdam                                         | M + F | Free of cancer and diabetes | Germany | Caucasian | 23,485            | 312   | 35-65 <sup>a</sup> | 1994-1998, 2009 | 10.8 <sup>a</sup> | 148-item FFQ                                         | Tertiles (0-7, 8-10,11-18) | Nordic diet score     | CHD incidence   | A   |                  |
|                       |                                                      |       |                             |         |           |                   |       |                    |                 |                   |                                                      |                            |                       | 321             |     | Stroke incidence |
|                       |                                                      |       |                             |         |           |                   |       |                    |                 |                   |                                                      |                            |                       |                 |     | T2DM             |
| Puaschitz et al. 2019 | Western Norway B-vitamin Intervention Trial (WENBIT) | M + F | Stable angina               | Norway  | Caucasian | 2019              | 171   | 28-85 <sup>a</sup> | 1999-2004, 2010 | 10.5 <sup>a</sup> | 169-item FFQ                                         | Tertiles (0-1, 2-3,4-6)    | HNFI                  | CVD mortality   | A   |                  |
|                       |                                                      |       |                             |         |           |                   |       |                    | 307             |                   |                                                      |                            |                       | 1999-2004, 2013 |     | 7.5 <sup>a</sup> |

Abbreviations: A, Agency; M, males; F, females; NA, not available; SFFQ, Short Food Frequency Questionnaire; HNFI, Healthy Nordic Food Index; I, Industry; MI, myocardial infraction; T2DM, Type 2 diabetes melitus; FFQ, food frequency questionnaire; DQI-SNR, diet quality index (DQI) hat assesses adherence to the 2005 Swedish Nutrition Recommendations (SNR); IHD, ischemic heart disease.

<sup>a</sup> Age range; <sup>b</sup>Median value given \*Population excludes individuals with CVD at baseline

**ESM Table 6. Dietary scores used to assess adherence to the Nordic dietary pattern.**

| Studies                     | Nordic Diet Index                                                                                                                                         | Scoring Categories                                            | Primary Food Components                                                                                                                                                                                                                                                                                      | Cut-offs         | Reference Guidelines                                                  |
|-----------------------------|-----------------------------------------------------------------------------------------------------------------------------------------------------------|---------------------------------------------------------------|--------------------------------------------------------------------------------------------------------------------------------------------------------------------------------------------------------------------------------------------------------------------------------------------------------------|------------------|-----------------------------------------------------------------------|
| [76, 77, 79-81, 83, 85, 88] | Healthy Nordic food index                                                                                                                                 | 0 - 6<br>(low adherence – high adherence)                     | Fish, cabbage, root vegetables, rye bread, oatmeal, apples, pears                                                                                                                                                                                                                                            | Population based | A priori chosen food items due to expected beneficial health effects  |
| [78,84, 89]                 | Diet quality index (DQI) that assesses adherence to the Swedish nutrition recommendations (SNR) and the Swedish dietary guidelines (SDG)<br><br>(DQI-SNR) | 0-6<br>(0 or 1 low, 2 or 3 medium, 4-6 high score)            | SFA*, PUFA*, fish and shellfish dietary fiber, fruit and vegetables, and sucrose.<br><br><i>*SFA and PUFA as indicators of fat intake</i>                                                                                                                                                                    | Serving based    | Swedish nutrition recommendations, Swedish dietary guidelines         |
| [82]                        | Nordic diet score                                                                                                                                         | 0-18<br>(0-7, 8-10,11-18 low adherence – high adherence)      | Fish, cabbage and cruciferous vegetables, root vegetables, potatoes, whole grain and rye bread, berries, apples, pears, low-fat dairy products, vegetable fats (excluding olive oil)                                                                                                                         | Population based | Healthy Nordic Food Index, New Nordic Diet, The Baltic Sea diet score |
| [87]                        | Baltic Sea Diet Score                                                                                                                                     | Population-based consumption quartiles or medians as cut-offs | Berries, apples, pears, tomato, cucumber, cabbage, roots, peas, lettuce, rye, oats, barley, fat-free milk and milk < 2% fat, salmon, freshwater fish, beef, pork, processed meat products, sausages, total fat as a percentage of total energy intake<br>Ratio of PUFA to SFA + trans-fatty acids<br>Ethanol | Population based | Baltic Sea Diet Pyramid, Nordic multicenter SYSDIET study             |



|      |                                         |                                                                               |                                                                                                                                                                                                                                                                                            |                     |                                         |
|------|-----------------------------------------|-------------------------------------------------------------------------------|--------------------------------------------------------------------------------------------------------------------------------------------------------------------------------------------------------------------------------------------------------------------------------------------|---------------------|-----------------------------------------|
| [90] | Modified Baltic Sea Diet Score          | 2-25<br>(2-10, 11-12, 13-15, 16-25<br>low adherence –<br>high adherence)      | All fruits, berries, roots, pulses,<br>vegetables, whole grains, fat-free<br>milk and milk < 2% fat, salmon,<br>freshwater fish, processed and<br>unprocessed meat, total fat as a<br>percentage of total energy<br>intake<br>Ratio of PUFA<br>to SFA<br>+ trans-fatty<br>acids<br>Ethanol | Population<br>based | Baltic Sea Diet Score                   |
| [86] | Danish food-based dietary<br>guidelines | Q1-Q5<br>(Very high-Q1, high,<br>intermediate, low, very low<br>adherence-Q5) | High intakes of unsaturated fats,<br>vegetables, fruits, fish<br><br>Low intakes for sugar sweetened<br>beverages, cold meat cuts and fast<br>food.                                                                                                                                        | Serving based       | Danish food-based dietary<br>guidelines |

**ESM Table 7. Confounding variables of included cohorts.**

| Study                                                | Gunge et al. 2017 Danish Diet, Cancer and Health cohort | Warensjo Lemming et al. 2018 Swedish Mammography Cohort | Lassale et al. 2016 EPIC | Drake et al. 2013 Malmö Diet and Cancer cohort | Hansen et al. 2017 Danish Diet, Cancer and Health cohort | Puaschitz et al. 2019 Western Norway B-vitamin Intervention Trial | Hlebowicz et al. 2013 Malmö Diet and Cancer cohort | Roswall et al. 2015 Swedish Women's Lifestyle and Health Cohort [93] |
|------------------------------------------------------|---------------------------------------------------------|---------------------------------------------------------|--------------------------|------------------------------------------------|----------------------------------------------------------|-------------------------------------------------------------------|----------------------------------------------------|----------------------------------------------------------------------|
| Number of variables in fully adjusted model          | 17                                                      | 7                                                       | 7                        | 12                                             | 12                                                       | 9                                                                 | 8                                                  | 11                                                                   |
| Number of multivariable models presented             | 4                                                       | 2                                                       | 2                        | 2                                              | 3                                                        | 3                                                                 | 2                                                  | 4                                                                    |
| Timing of measurement of confounding variables       | Baseline                                                | Baseline                                                | Baseline                 | Baseline                                       | Baseline                                                 | Baseline                                                          | Baseline                                           | Baseline                                                             |
| <b>Pre-specified primary confounding variables</b>   |                                                         |                                                         |                          |                                                |                                                          |                                                                   |                                                    |                                                                      |
| Age                                                  | ✓                                                       | ✓                                                       | ✓                        | ✓                                              | ✓                                                        | ✓                                                                 | ✓                                                  | ✓                                                                    |
| <b>Pre-specified secondary confounding variables</b> |                                                         |                                                         |                          |                                                |                                                          |                                                                   |                                                    |                                                                      |
| Sex                                                  | ✓                                                       | ✓                                                       | ✓                        | ✓                                              | ✓                                                        | ✓                                                                 | ✓                                                  | ✓                                                                    |
| Body mass index, weight                              | ✓                                                       | ✓                                                       | ✓                        | ✓                                              | ✓                                                        |                                                                   |                                                    | ✓                                                                    |
| Waist circumference                                  | ✓                                                       |                                                         |                          | ✓                                              | ✓                                                        |                                                                   | ✓                                                  |                                                                      |
| Family history of CVD                                |                                                         |                                                         |                          |                                                |                                                          |                                                                   |                                                    |                                                                      |
| Energy Intake                                        | ✓                                                       | ✓                                                       |                          | ✓                                              |                                                          | ✓                                                                 |                                                    | ✓                                                                    |
| Smoking                                              | ✓                                                       | ✓                                                       | ✓                        | ✓                                              | ✓                                                        | ✓                                                                 | ✓                                                  | ✓                                                                    |
| Exercise/physical activity                           | ✓                                                       | ✓                                                       | ✓                        | ✓                                              | ✓                                                        | ✓                                                                 | ✓                                                  |                                                                      |
| Diabetes/Dysglycemia                                 |                                                         |                                                         |                          |                                                | ✓                                                        | ✓                                                                 |                                                    |                                                                      |
| Dyslipidemia                                         | ✓                                                       |                                                         |                          |                                                | ✓                                                        |                                                                   |                                                    |                                                                      |
| Hypertension/SBP                                     | ✓                                                       |                                                         |                          |                                                | ✓                                                        | ✓                                                                 | ✓                                                  |                                                                      |
| <b>Other confounding variables</b>                   |                                                         |                                                         |                          |                                                |                                                          |                                                                   |                                                    |                                                                      |
| Education                                            | ✓                                                       | ✓                                                       | ✓                        | ✓                                              | ✓                                                        |                                                                   | ✓                                                  | ✓                                                                    |
| Alcohol                                              |                                                         |                                                         |                          | ✓                                              | ✓                                                        | ✓                                                                 | ✓                                                  | ✓                                                                    |
| Alcohol from wine                                    | ✓                                                       |                                                         |                          |                                                |                                                          |                                                                   |                                                    |                                                                      |
| Alcohol from beer/spirits                            | ✓                                                       |                                                         |                          |                                                |                                                          |                                                                   |                                                    |                                                                      |
| Total Cholesterol                                    | ✓                                                       |                                                         |                          |                                                | ✓                                                        |                                                                   |                                                    |                                                                      |
| Non-fermented milk                                   |                                                         | ✓                                                       |                          |                                                |                                                          |                                                                   |                                                    |                                                                      |
| Meat, red meat                                       | ✓                                                       |                                                         |                          |                                                |                                                          |                                                                   |                                                    | ✓                                                                    |
| Hormonal replacement therapy                         | ✓                                                       |                                                         |                          |                                                |                                                          |                                                                   |                                                    |                                                                      |
| Menopause                                            | ✓                                                       |                                                         |                          |                                                |                                                          |                                                                   |                                                    |                                                                      |
| Method of assessment                                 |                                                         |                                                         |                          | ✓                                              |                                                          |                                                                   | ✓                                                  |                                                                      |
| Cohabiting status                                    |                                                         | ✓                                                       |                          | ✓                                              |                                                          |                                                                   | ✓                                                  |                                                                      |
| Processed meat consumption                           | ✓                                                       |                                                         |                          |                                                |                                                          |                                                                   |                                                    | ✓                                                                    |
| Tobacco consumption                                  |                                                         |                                                         |                          |                                                |                                                          |                                                                   |                                                    | ✓                                                                    |
| Time since cessation of smoking                      | ✓                                                       |                                                         |                          |                                                |                                                          |                                                                   |                                                    | ✓                                                                    |
| Charlson's comorbidity index                         |                                                         | ✓                                                       |                          |                                                |                                                          |                                                                   |                                                    |                                                                      |
| Other                                                | Time under study                                        | Diet score, non-fermented milk                          | Study centre             | Season                                         | Atrial fibrillation                                      | Statin use                                                        | Economic status, Season                            |                                                                      |

**ESM Table 7. Confounding variables of included cohorts (continued).**

| Study                                                 | Mandalazi et al. 2016<br>Malmö Diet and Cancer cohort | Karneva et al. 2014<br>Helsinki Birth Cohort<br>Study, Health 2000<br>Survey | Ewers et al. 2020<br>the Copenhagen<br>General<br>Population Study | Lacoppidan et al. 2015<br>Danish Diet,<br>Cancer and<br>Health cohort | Tertsunen et al. 2020<br>Kuopio Ischaemic<br>Heart Disease Risk<br>Factor Study | Roswall et al. 2015<br>Swedish<br>Women's<br>Lifestyle and<br>Health<br>Cohort [92] | Galbete et al. 2018<br>EPIC-<br>Potsdam |
|-------------------------------------------------------|-------------------------------------------------------|------------------------------------------------------------------------------|--------------------------------------------------------------------|-----------------------------------------------------------------------|---------------------------------------------------------------------------------|-------------------------------------------------------------------------------------|-----------------------------------------|
| <b>Number of variables in fully adjusted model</b>    | 10                                                    | 8                                                                            | 11                                                                 | 9                                                                     | 9                                                                               | 12                                                                                  | 12                                      |
| <b>Number of multivariable models presented</b>       | 5                                                     | 3                                                                            | 3                                                                  | 4                                                                     | 2                                                                               | 4                                                                                   | 2                                       |
| <b>Timing of measurement of confounding variables</b> | Baseline                                              | Baseline                                                                     | Baseline                                                           | Baseline                                                              | Baseline                                                                        | Baseline                                                                            | Baseline                                |
| <b>Pre-specified primary confounding variables</b>    |                                                       |                                                                              |                                                                    |                                                                       |                                                                                 |                                                                                     |                                         |
| Age                                                   | ✓                                                     | ✓                                                                            | ✓                                                                  | ✓                                                                     | ✓                                                                               | ✓                                                                                   | ✓                                       |
| <b>Pre-specified secondary confounding variables</b>  |                                                       |                                                                              |                                                                    |                                                                       |                                                                                 |                                                                                     |                                         |
| Sex                                                   | ✓                                                     | ✓                                                                            | ✓                                                                  | ✓                                                                     | ✓                                                                               | ✓                                                                                   | ✓                                       |
| Body mass index, weight                               | ✓                                                     |                                                                              | ✓                                                                  | ✓                                                                     |                                                                                 | ✓                                                                                   |                                         |
| Waist circumference                                   | ✓                                                     |                                                                              |                                                                    |                                                                       |                                                                                 |                                                                                     |                                         |
| Family history of CVD                                 |                                                       |                                                                              |                                                                    |                                                                       |                                                                                 |                                                                                     |                                         |
| Energy Intake                                         |                                                       | ✓                                                                            |                                                                    | ✓                                                                     | ✓                                                                               | ✓                                                                                   | ✓                                       |
| Smoking                                               | ✓                                                     | ✓                                                                            | ✓                                                                  | ✓                                                                     | ✓                                                                               | ✓                                                                                   | ✓                                       |
| Exercise/physical activity                            | ✓                                                     | ✓                                                                            | ✓                                                                  | ✓                                                                     | ✓                                                                               |                                                                                     | ✓                                       |
| Diabetes/Dysglycemia                                  |                                                       |                                                                              | ✓                                                                  |                                                                       |                                                                                 | ✓                                                                                   |                                         |
| Dyslipidemia                                          | ✓                                                     |                                                                              |                                                                    |                                                                       |                                                                                 |                                                                                     |                                         |
| Hypertension/SBP                                      | ✓                                                     |                                                                              | ✓                                                                  |                                                                       |                                                                                 | ✓                                                                                   | ✓                                       |
| <b>Other confounding variables</b>                    |                                                       |                                                                              |                                                                    |                                                                       |                                                                                 |                                                                                     |                                         |
| Education                                             | ✓                                                     | ✓                                                                            | ✓                                                                  | ✓                                                                     | ✓                                                                               | ✓                                                                                   | ✓                                       |
| Alcohol                                               | ✓                                                     |                                                                              | ✓                                                                  | ✓                                                                     |                                                                                 | ✓                                                                                   | ✓                                       |
| Alcohol from wine                                     |                                                       |                                                                              |                                                                    |                                                                       |                                                                                 |                                                                                     |                                         |
| Alcohol from beer/spirits                             |                                                       |                                                                              |                                                                    |                                                                       |                                                                                 |                                                                                     |                                         |
| Total Cholesterol                                     |                                                       |                                                                              |                                                                    |                                                                       |                                                                                 |                                                                                     |                                         |
| Non-fermented milk                                    |                                                       |                                                                              |                                                                    |                                                                       |                                                                                 |                                                                                     |                                         |
| Meat, red meat                                        |                                                       |                                                                              |                                                                    | ✓                                                                     |                                                                                 |                                                                                     |                                         |
| Hormonal replacement therapy                          |                                                       |                                                                              |                                                                    |                                                                       |                                                                                 |                                                                                     |                                         |
| Menopause                                             |                                                       |                                                                              |                                                                    |                                                                       |                                                                                 |                                                                                     |                                         |
| Method of assessment                                  |                                                       |                                                                              |                                                                    |                                                                       |                                                                                 |                                                                                     |                                         |
| Cohabiting status                                     |                                                       |                                                                              |                                                                    |                                                                       |                                                                                 |                                                                                     |                                         |
| Processed meat consumption                            |                                                       |                                                                              |                                                                    |                                                                       |                                                                                 | ✓                                                                                   |                                         |
| Tobacco consumption                                   |                                                       |                                                                              |                                                                    |                                                                       |                                                                                 | ✓                                                                                   |                                         |
| Time since cessation of smoking                       |                                                       |                                                                              |                                                                    |                                                                       |                                                                                 | ✓                                                                                   |                                         |
| Charlson's comorbidity index                          |                                                       |                                                                              |                                                                    |                                                                       |                                                                                 |                                                                                     |                                         |
| Other                                                 | season, method of dietary assesment                   | Abdominal obesity,<br>vitamin D intake                                       | LDL-Cholesterol,<br>Income                                         |                                                                       | Income, marital<br>status, examination<br>year                                  |                                                                                     | Multivitamin                            |

**ESM Table 8. Newcastle-Ottawa Scale (NOS) scores of included cohorts.**

| Study                                                 | Selection <sup>a</sup> | Outcome <sup>b</sup> | Comparability <sup>c</sup> | Total <sup>d</sup> |
|-------------------------------------------------------|------------------------|----------------------|----------------------------|--------------------|
| The Danish Diet, Cancer and Health cohort [76]        | 3                      | 3                    | 1                          | 7                  |
| Swedish Mammography Cohort [81]                       | 2                      | 3                    | 1                          | 6                  |
| EPIC [85]                                             | 3                      | 3                    | 1                          | 7                  |
| Malmö Diet and Cancer cohort [84]                     | 4                      | 3                    | 1                          | 8                  |
| The Danish Diet, Cancer and Health cohort [77]        | 3                      | 3                    | 2                          | 8                  |
| Western Norway B-vitamin Intervention Trial [83]      | 3                      | 3                    | 1                          | 7                  |
| EPIC-Potsdam [82]                                     | 3                      | 3                    | 1                          | 7                  |
| Malmö Diet and Cancer cohort [78]                     | 4                      | 3                    | 1                          | 8                  |
| Swedish Women's Lifestyle and Health Cohort [83]      | 2                      | 3                    | 1                          | 6                  |
| Swedish Women's Lifestyle and Health Cohort [82]      | 3                      | 3                    | 1                          | 7                  |
| Malmö Diet and Cancer cohort [89]                     | 3                      | 4                    | 1                          | 8                  |
| Helsinki Birth Cohort Study, Health 2000 Survey [87]  | 3                      | 4                    | 1                          | 8                  |
| The Copenhagen General Population Study [86]          | 3                      | 3                    | 2                          | 8                  |
| The Danish Diet, Cancer and Health Cohort Study [88]  | 3                      | 3                    | 2                          | 8                  |
| Kuopio Ischaemic Heart Disease Risk Factor Study [90] | 3                      | 3                    | 2                          | 8                  |

Abbreviations: EPIC=European Prospective Investigation into Cancer and Nutrition

<sup>a</sup>Maximum 4 points awarded for cohort representativeness, selection of non-exposed cohort, exposure assessment, and demonstration outcome not present at baseline

<sup>b</sup>Maximum 3 points awarded for follow-up length, adequacy of follow-up, and outcome assessment

<sup>c</sup>Maximum 2 points awarded for controlling for the pre-specified primary confounding variable (age) and 4 of the 5 secondary (markers of overweight/obesity, family history of diabetes, energy intake, physical activity, sex) confounding variables

<sup>d</sup>A maximum of 9 points could be awarded. Cohorts with NOS  $\geq 6$  are considered high quality.

**ESM Table 9. Selected sensitivity analyses in which the systematic removal of a cohort study altered the significance of the effect estimate or the evidence for heterogeneity.**

| Outcome          | Removal of                                   | MD [95% CI], P <sub>MD</sub><br>I <sup>2</sup> , P <sub>Q</sub>                               |
|------------------|----------------------------------------------|-----------------------------------------------------------------------------------------------|
| CVD INCIDENCE    | Roswall et al. 2015 [83] <sup>b</sup>        | 0.70 [0.61, 0.81], P <sub>MD</sub> <0.001,<br>I <sup>2</sup> =0%, P <sub>Q</sub> =0.63        |
|                  | Hlebowicz et al. 2013 - Males <sup>c</sup>   | 0.96 [0.90, 1.02], P <sub>MD</sub> =0.16<br>I <sup>2</sup> =85%, P <sub>Q</sub> =0.01         |
|                  | Hlebowicz et al. 2013 - Females <sup>c</sup> | 0.95 [0.89, 1.01], P <sub>MD</sub> =0.08<br>I <sup>2</sup> =92%, P <sub>Q</sub> <0.001        |
| T2DM INCIDENCE   | Lacoppidan et al. 2015 – Males <sup>b</sup>  | 1.01 [0.93, 1.09], P <sub>MD</sub> =0.89<br>I <sup>2</sup> =0%, P <sub>Q</sub> =0.59          |
| CHD INCIDENCE    | Roswall et al. 2015 [83] <sup>a</sup>        | 0.82 [0.68, 0.97], P <sub>MD</sub> =0.02<br>I <sup>2</sup> =27%, P <sub>Q</sub> =0.25         |
|                  | Gunge et al. 2017 <sup>b</sup>               | 0.96 [95% CI 0.85, 1.09], P <sub>MD</sub> =0.51, I <sup>2</sup> =7%,<br>P <sub>Q</sub> =0.36. |
| STROKE INCIDENCE | Hansen et al. 2017 <sup>c</sup>              | 0.86 [0.82, 1.17], P <sub>MD</sub> =0.80<br>I <sup>2</sup> =0%, P <sub>Q</sub> =0.96          |
|                  | Galbete et al. 2018 <sup>c</sup>             | 0.88 [0.75, 1.03], P=0.10<br>I <sup>2</sup> =36%, P <sub>Q</sub> =0.21                        |

P<sub>MD</sub>, mean difference p-value, P<sub>Q</sub>, Cochrane Q p-value, T2DM, Type 2 Diabetes Mellitus.

<sup>a</sup> removal of this study results in significance of the overall effect

<sup>b</sup> removal of this study explains heterogeneity

<sup>c</sup> removal of this study results in a loss of significance of the overall effect

**ESM Table 10. Characteristics of included RCTs.**

| Study, Year            | Intervention, Control | Participants (M, W)                             | Mean age, y (SD or range) | Baseline BMI (kg/m <sup>2</sup> ), mean (SD) | Baseline LDL-C (mmol/L), mean (SD) | Setting                       | Design   | Feeding Control <sup>a</sup>      | Intervention or Comparator            | Diet (% C:F:P) <sup>b</sup> | Energy Balance <sup>c</sup> | Outcome                                                                           | Follow-up duration, weeks | Funding Sources <sup>e</sup> |
|------------------------|-----------------------|-------------------------------------------------|---------------------------|----------------------------------------------|------------------------------------|-------------------------------|----------|-----------------------------------|---------------------------------------|-----------------------------|-----------------------------|-----------------------------------------------------------------------------------|---------------------------|------------------------------|
| Gotfredsen et al. 2020 | Intervention          | 72 individuals with IHD Risk Factors (29M, 43W) | 51.8 (9.8)                | 26.9 (3.6)                                   | 3.10 (0.91)                        | Denmark                       | Parallel | DA                                | Official dietary guidelines           | Not available               | Neutral                     | HbA1c, Glucose, Insulin, LDL-C, HDL-C, **Non-HDL-C, TG, BW, BMI WC, SBP, DBP, CRP | 24                        | A                            |
|                        | Control               | 73 individuals with IHD Risk Factors (30M, 43W) | 49.2 (9.8)                | 26.5 (3.9)                                   | 3.24 (0.76)                        |                               |          |                                   | Habitual diet                         | Not available               |                             |                                                                                   |                           |                              |
| Poulsen et al. 2014    | Intervention          | 91 OB                                           | 42.7 (13.1)*              | 30.1 (4.6)*                                  | 2.95 (0.84)*                       | Denmark                       | Parallel | Suppl                             | New Nordic Diet                       | 52:30:18                    | Neutral                     | Glucose, Insulin, LDL-C, HDL-C, TG, BW, WC, SBP, DBP, CRP                         | 26                        | A, I                         |
|                        | Control               | 56 OB                                           | 41.0 (13.0)*              | 30.5 (5.3)*                                  | 2.96 (0.81)*                       |                               |          |                                   | Average Danish Diet                   | 50:35:15                    |                             |                                                                                   |                           |                              |
| Uusitupa et al. 2013   | Intervention          | 96 MetS (~29M, 67W)                             | 54.0 (8.5)*               | 31.6 (3.5)*                                  | 3.25 (0.80)                        | Nordic Countries <sup>†</sup> | Parallel | Suppl, DA                         | Healthy Nordic Diet                   | 45-52:30-35:18-20           | Neutral                     | Glucose, LDL-C, Non-HDL-C, HDL-C, TG, ApoB BW, SBP, DBP, CRP                      | 18 (24-wk for 2 sites)    | A, I                         |
|                        | Control               | 70 MetS (~21M, 49W)                             | 54.9 (8.6)*               | 31.7 (2.8)*                                  | 3.21 (0.89)                        |                               |          |                                   | Usual Nordic diet                     | 45-47:35:18-20              |                             |                                                                                   |                           |                              |
| Adamsson et al. 2010   | Intervention          | 44 mildly HC (17M, 27W)                         | 52.6 (7.8)                | 26.3 (3.2)                                   | 4.0 (0.6)                          | Sweden                        | Parallel | Suppl to ND only                  | Healthy Nordic Diet                   | 45-60:25-35:10-20           | Neutral                     | Glucose, Insulin, LDL-C, HDL-C, **Non-HDL-C, TG, ApoB BW, BMI SBP, DBP, CRP       | 6                         | A                            |
|                        | Control               | 42 mildly HC (15M, 27W)                         | 53.4 (8.1)                | 26.5 (3.3)                                   | 4.2 (1.0)                          |                               |          |                                   | Usual Western diet                    | NR                          |                             |                                                                                   |                           |                              |
| Huseinovic et al. 2016 | Intervention          | 47 OW postpartum (0M, 47W)                      | 31.8 (4.5)*               | 31.8 (4.0)                                   | NR                                 | Sweden                        | Parallel | DA, text messages and phone calls | Nordic Nutrition Recommendations 2004 | 50-60:<30:10-20             | Negative                    | BW, BMI, WC                                                                       | 12                        | A                            |
|                        | Control               | 53 OW postpartum (0M, 53W)                      | 32.6 (4.7)*               | 31.6 (3.4)                                   | NR                                 |                               |          |                                   | DA only                               | General healthy eating      |                             |                                                                                   |                           |                              |
| Due et al. 2008        | Intervention          | 48 OW/OB (~21M, 27W)                            | 27.3 (4.9)*               | 31.6 (2.7)*                                  | 2.78 (0.81)                        | Denmark                       | Parallel | Suppl, DA                         | Nordic Nutrition Recommendations 2004 | 60:25:15                    | Neutral                     | Glucose, Insulin, LDL-C, **Non-HDL-C, TG, BW, BMI WC, CRP                         | ~24                       | A, I                         |
|                        | Control               | 25 OW/OB (~11M, 14W)                            | 27.6 (5.1)*               | 31.3 (2.5)*                                  | 2.71 (0.71)                        |                               |          |                                   | Average Danish Diet                   | 50:35:15                    |                             |                                                                                   |                           |                              |

"IHD, Ischemic Heart Disease; A, agency; C, carbohydrate; DA, dietary advice; F, fat; HC, hypercholesterolemia; I, industry; M, men; MetS, metabolic syndrome; ND, Nordic diet intervention; NR, not reported; OB, obese; OW, overweight; P, protein; Suppl, supplemental feeding control; W, women; BW, body weight; WC, waist circumference; TG, triglycerides; ApoB, apoprotein B; SBP and DBP, systolic and diastolic blood pressure; CRP, c-reactive protein.

a Supplemental feeding control (Supp) is the provision of some meals and foods consumed during the study. Dietary advice (DA) is the provision of counseling on the appropriate intervention and control diets.

b Planned macronutrient composition of intervention and control diets.

c Negative energy balance refers to a deficit in normal energy intake and/or intake below energy requirements. Neutral energy balance refers to the maintenance of usual energy intake and/or meeting energy requirements.

d For ROB, an assessment was performed using the Cochrane Risk of Bias tool, including the evaluation of individual domains of risk of bias (sequence generation, allocation concealment, blinding of participants/ personnel and outcome assessors, incomplete outcome data, selective outcome reporting). Each of the 5 domains was evaluated as either low, high or unclear ROB and the overall ROB category was determined based on the most selected category.

e Agency funding is that from government, university, or not-for-profit sources. Industry funding is that from trade organizations that obtain revenue from the sale of products.

\* Calculated before dropout

\*\* Non-HDL-C calculated

†Finland, Sweden, Denmark, Iceland

**ESM Table 11. Selected sensitivity analyses in which the systematic removal of an individual trial altered the significance of the effect estimate or the evidence for heterogeneity.**

| Outcome                          | Removal of                          | MD [95% CI], P <sub>MD</sub><br>I <sup>2</sup> , P <sub>Q</sub>          |
|----------------------------------|-------------------------------------|--------------------------------------------------------------------------|
| <b>BLOOD LIPIDS</b>              |                                     |                                                                          |
| LDL-C, (mmol/l)                  | Adamsson et al. 2010 <sup>b,c</sup> | -0.10 [-0.19, -0.02], P <sub>MD</sub> =0.02<br>88%, P <sub>Q</sub> =0.64 |
|                                  | Due et al. 2008 <sup>c</sup>        | -0.29 [-0.61, 0.02], P <sub>MD</sub> =0.06<br>92%, P <sub>Q</sub> <0.001 |
|                                  | Poulsen et al. 2014 <sup>c</sup>    | -0.61 [-1.66, -0.45], P <sub>MD</sub> =0.26<br>57%, P <sub>Q</sub> =0.1  |
|                                  | Uusitupa et al. 2013 <sup>c</sup>   | -0.30 [-0.65, 0.05], P <sub>MD</sub> =0.10<br>92%, P <sub>Q</sub> <0.001 |
| Non-HDL-C, (mmol/l)              | Adamsson et al. 2010 <sup>b,c</sup> | -0.14 [-0.48, 0.20], P <sub>MD</sub> =0.42<br>0%, P <sub>Q</sub> =1      |
| HDL-C, (mmol/l)                  | Adamsson et al. 2010 <sup>b</sup>   | -0.00 [-0.04, 0.04], P <sub>MD</sub> =0.92<br>32%, P <sub>Q</sub> =0.22  |
| Triglycerides, (mmol/l)          | Adamsson et al. 2010 <sup>a,b</sup> | -0.09 [-0.16, -0.01], P <sub>MD</sub> =0.02<br>0%, P <sub>Q</sub> =0.4   |
|                                  | Poulsen et al. 2014 <sup>c</sup>    | -0.01 [-0.09, 0.08], P <sub>MD</sub> =0.90<br>0%, P <sub>Q</sub> =0.52   |
| Apo-B, (g/l)                     | Adamsson et al. 2010 <sup>c</sup>   | -0.04 [-0.10, 0.02], P <sub>MD</sub> =0.19<br>n/a                        |
| <b>ADIPOSITY</b>                 |                                     |                                                                          |
| BMI, (kg/m <sup>2</sup> )        | Due et al. 2008 <sup>b</sup>        | -1.04 [-1.27, -0.82], P <sub>MD</sub> =0.008<br>0%, P <sub>Q</sub> =0.60 |
| Waist circumference, (cm)        | Poulsen et al. 2014 <sup>c</sup>    | -0.61 [-1.66, -0.45], P <sub>MD</sub> =0.26<br>57%, P <sub>Q</sub> =0.1  |
|                                  | Gotfredsen et al. 2020 <sup>b</sup> | -2.49 [-3.66, -1.33], P <sub>MD</sub> <0.001<br>0%, P <sub>Q</sub> =0.60 |
| <b>BLOOD PRESSURE</b>            |                                     |                                                                          |
| Diastolic blood pressure, (mmHg) | Gotfredsen et al. 2020 <sup>b</sup> | -2.32 [-3.83, -0.82], P <sub>MD</sub> =0.39<br>0%, P <sub>Q</sub> =0.002 |
|                                  | Poulsen et al. 2014 <sup>b,c</sup>  | -1.02 [-2.29, 0.25], P <sub>MD</sub> =0.11<br>0%, P <sub>Q</sub> =0.37   |
| <b>INFLAMMATION</b>              |                                     |                                                                          |
| CRP, (nmol/l)                    | Poulsen et al. 2014 <sup>b</sup>    | -0.02 [-0.43, 0.39], P <sub>MD</sub> =0.92<br>0%, P <sub>Q</sub> =0.51   |

CRP, c-reactive protein; MD, mean difference

<sup>a</sup> removal of this study results in significance of the overall effect

<sup>b</sup> removal of this study explains heterogeneity

<sup>c</sup> removal of this study results in a loss of significance of the overall effect



**ESM Table 12. GRADE assessment for the association between Nordic dietary patterns and cardiometabolic disease outcomes for prospective cohort studies.**

| Outcome              | Cohort comparisons, <i>n</i> | Risk of bias | Inconsistency            | Indirectness | Imprecision          | Other considerations                | RR (95% CI)                                                      | Certainty        | Interpretation of the magnitude of the association |
|----------------------|------------------------------|--------------|--------------------------|--------------|----------------------|-------------------------------------|------------------------------------------------------------------|------------------|----------------------------------------------------|
| <b>CVD incidence</b> | 3                            | not serious  | serious <sup>a</sup>     | not serious  | serious <sup>b</sup> | dose response gradient <sup>c</sup> | 0.93 (0.88, 0.99) <sup>l</sup><br>0.93 (0.88, 0.99) <sup>m</sup> | ⊕⊕○○<br>LOW      | Small important                                    |
| <b>CVD mortality</b> | 8                            | not serious  | not serious              | not serious  | not serious          | dose response gradient <sup>d</sup> | 0.81 (0.73, 0.90) <sup>l</sup><br>0.74 (0.69, 0.80) <sup>m</sup> | ⊕⊕⊕○<br>MODERATE | Moderate                                           |
| <b>CHD</b>           | 5                            | not serious  | not serious <sup>e</sup> | not serious  | serious <sup>f</sup> | dose response gradient <sup>g</sup> | 0.88 (0.72, 1.06) <sup>l</sup><br>0.88 (0.79, 0.98) <sup>m</sup> | ⊕⊕○○<br>LOW      | Small important                                    |
| <b>Stroke</b>        | 3                            | not serious  | not serious              | not serious  | serious <sup>h</sup> | dose response gradient <sup>i</sup> | 0.88 (0.79, 0.98) <sup>l</sup><br>0.87 (0.78, 0.97) <sup>m</sup> | ⊕⊕○○<br>LOW      | Small important                                    |
| <b>T2D</b>           | 6                            | not serious  | not serious              | not serious  | serious <sup>j</sup> | dose response gradient <sup>k</sup> | 0.96 (0.86, 1.06) <sup>l</sup><br>0.91 (0.84, 0.99) <sup>m</sup> | ⊕⊕○○<br>LOW      | Small important                                    |

Cohorts start at low-certainty evidence from which the evidence can be upgraded or downgraded based on prespecified criteria. Criteria to upgrade included a dose-response gradient, large magnitude of the effect (RR ≥2 or RR ≤0.5 and attenuation by plausible confounding). Criteria to downgrade included study limitations (NOS [46]); inconsistency (substantial unexplained inter-study heterogeneity, I<sup>2</sup>> 50% and P<sub>Q</sub><0.10); indirectness (presence of factors relating to the population, exposures and outcomes that limit generalizability), imprecision (95% CIs for pooled estimates crossed prespecified MIDs, as shown in the table, and publication bias (significant detection of small-study effects).

a. Downgrade applied due to serious inconsistency (I<sup>2</sup> = 88%, P=0.0002).

b. Downgrade for serious imprecision for CVD incidence, as the 95% CI [0.88, 0.99] overlap with the minimally important difference for clinical benefit (RR=0.95).

c. Upgrade for a dose-response gradient, as the GLST analysis revealed a significant linear inverse relationship between the Nordic diet and incident CVD (P<0.001).

d. Upgrade for a dose-response gradient, as the GLST analysis revealed a significant linear inverse relationship between the Nordic diet and CVD mortality (P<0.001).

e. No downgrade for serious inconsistency for the relation of adherence of the Nordic dietary pattern with CHD incidence, as although there was evidence of substantial heterogeneity (I<sup>2</sup> = 58% (P<sub>Q</sub>=0.05). ), removal of the Danish Diet, Cancer and Health women cohort explained most of the heterogeneity (I<sup>2</sup>=7%, P=0.36) without altering the direction, magnitude or significance of the pooled effect estimate (RR 0.96 [95% CI 0.85, 1.09], P=0.51).

f. Downgrade for serious imprecision for CHD incidence, as the 95% CI [0.72, 1.06] overlap with the minimally important difference for clinical benefit (RR=0.95) and harm (RR=1.05).

g. Upgrade for a dose-response gradient, as the GLST analysis revealed a significant linear inverse relationship between the Nordic diet and incident CHD (P<0.001).

h. Downgrade for serious imprecision for stroke incidence, as the 95% CI [0.79, 0.98] overlap with the minimally important difference for clinical benefit (RR=0.95).

i. Upgrade for a dose-response gradient, as the GLST analysis revealed a significant linear inverse relationship between the Nordic diet and incident stroke (P<0.001).

j. Downgrade for serious imprecision for T2D incidence, as the 95% CI [0.86, 1.06] overlap with the minimally important difference for clinical benefit (RR=0.95) and harm (RR=1.05).

k. Upgrade for a dose-response gradient, as the GLST analysis revealed a significant linear inverse relationship between the Nordic diet and incident stroke (P<0.001).

l. Extreme quantiles.

m. Global dose-response meta-analysis (DRM) estimates.

**ESM Table 13. NutriGRADE Assessment for association of Nordic dietary patterns with cardiometabolic outcomes in Cohort studies.**

| Outcome              | Cohort comparisons, <i>n</i><br><i>[Number of events/Participants]</i> | Quality assessment (points; Max 10)                                                                |                                                                                                                                  |                                                                                                                           |            |                               |              |                                                                                              |                                                        | Effect                             | Score                       |
|----------------------|------------------------------------------------------------------------|----------------------------------------------------------------------------------------------------|----------------------------------------------------------------------------------------------------------------------------------|---------------------------------------------------------------------------------------------------------------------------|------------|-------------------------------|--------------|----------------------------------------------------------------------------------------------|--------------------------------------------------------|------------------------------------|-----------------------------|
|                      |                                                                        | Risk of bias, study quality and study limitations<br><i>Assessed using NOS as shown in table 6</i> | Precision**                                                                                                                      | Heterogeneity                                                                                                             | Directness | Publication Bias              | Funding Bias | Effect Size<br><i>Important benefit was defined as RR of &lt;0.8 and harm RR of &gt; 1.2</i> | Dose Response                                          | Pooled Effect Estimate RR (95% CI) | Meta-evidence (Final point) |
| <b>CVD incidence</b> | 3<br>10,279/60,436                                                     | 1                                                                                                  | 1                                                                                                                                | 0                                                                                                                         | 1          | 0                             | 1            | 0                                                                                            | 1                                                      | 0.93<br>(0.88, 0.99)               | 5<br>Low                    |
| <b>Reasons</b>       |                                                                        | Low risk of bias                                                                                   | ≥500 participants or ≥500 events were included, and the 95% CI excludes the null value                                           | 2-5 studies x multiply by 0                                                                                               |            | Publication bias not assessed |              | No point was awarded because effect estimate showed small effect size (RR: 0.80 - 1.20).     | 1 point was awarded for the dose-response association. |                                    |                             |
| <b>CVD mortality</b> | 8<br>11,146/639,086                                                    | 1                                                                                                  | 1                                                                                                                                | 0.5                                                                                                                       | 1          | 0                             | 1            | 0                                                                                            | 1                                                      | 0.81<br>(0.73, 0.90)               | 5.5<br>Low                  |
| <b>Reasons</b>       |                                                                        | Low risk of bias                                                                                   | ≥500 participants or ≥500 events were included, and the 95% CI excludes the null value                                           | .5 point was awarded for reporting no important heterogeneity ( $I^2 < 40\%$ ) from 8 cohort comparisons (multiplier: 1). |            | Publication bias not assessed |              | No point was awarded because effect estimate showed small effect size (RR: 0.80 - 1.20).     | 1 point was awarded for the dose-response association. |                                    |                             |
| <b>CHD</b>           | 5<br>3960/123,382                                                      | 1                                                                                                  | 1                                                                                                                                | 0                                                                                                                         | 1          | 0                             | 1            | 0                                                                                            | 1                                                      | 0.88<br>(0.72, 1.06)               | 5<br>Low                    |
| <b>Reasons</b>       |                                                                        | Low risk of bias                                                                                   | ≥500 events were included, but 95% CI overlaps the null value and 95% CI excludes important benefit (RR <0.8) or harm (RR >1.2). | 2-5 studies x multiply by 0                                                                                               |            | Publication bias not assessed |              | No point was awarded because effect estimate showed small effect size (RR: 0.80 - 1.20).     | 1 point was awarded for the dose-response association. |                                    |                             |
| <b>Stroke</b>        | 3<br>3302/122,133                                                      | 1                                                                                                  | 1                                                                                                                                | 0.5                                                                                                                       | 1          | 0                             | 1            | 0                                                                                            | 1                                                      | 0.88<br>(0.79, 0.98)               | 5.5<br>Low                  |

|                |                     |                  |                                                                                                                                  |                                                                                   |   |                               |   |                                                                                          |                                                        |                      |            |
|----------------|---------------------|------------------|----------------------------------------------------------------------------------------------------------------------------------|-----------------------------------------------------------------------------------|---|-------------------------------|---|------------------------------------------------------------------------------------------|--------------------------------------------------------|----------------------|------------|
| <b>Reasons</b> |                     | Low risk of bias | ≥500 participants or ≥500 events were included, and the 95% CI excludes the null value                                           |                                                                                   |   | Publication bias not assessed |   | No point was awarded because effect estimate showed small effect size (RR: 0.80 - 1.20). | 1 point was awarded for the dose-response association. |                      |            |
| <b>T2DM</b>    | 6<br>13,121/112,157 | 1                | 1                                                                                                                                | 0.2                                                                               | 1 | 0                             | 1 | 0                                                                                        | 1                                                      | 0.96<br>(0.86, 1.06) | 5.2<br>Low |
| <b>Reasons</b> |                     | Low risk of bias | ≥500 events were included, but 95% CI overlaps the null value and 95% CI excludes important benefit (RR <0.8) or harm (RR >1.2). | 0.1 score each for reporting I2, random effects and multiplier 1 for 6-9 studies. |   | Publication bias not assessed |   | No point was awarded because effect estimate showed small effect size (RR: 0.80 - 1.20). | 1 point was awarded for the dose-response association. |                      |            |

Reference: Schwingshackl L, Knüppel S, Schwedhelm C, Hoffmann G, Missbach B, Stelmach-Mardas M, Dietrich S, Eichelmann F, Kontopantelis E, Iqbal K, Aleksandrova K, Lorkowski S, Leitzmann MF, Kroke A, Boeing H. Perspective: NutriGrade: A Scoring System to Assess and Judge the Meta-Evidence of Randomized Controlled Trials and Cohort Studies in Nutrition Research. *Adv Nutr* 2016;7:994-

**ESM Table 14. GRADE assessment for the effect of Nordic dietary patterns and cardiometabolic risk factors in RCTs.**

| Outcome                         | Studies | Study design | Quality assessment |                           |                          |                       |             | Publication Bias <sup>a</sup>   | Effect (MD [95%CI], P <sub>MD</sub> ) | Interpretation of magnitude of effect <sup>b</sup> | Quality <sup>c</sup> |
|---------------------------------|---------|--------------|--------------------|---------------------------|--------------------------|-----------------------|-------------|---------------------------------|---------------------------------------|----------------------------------------------------|----------------------|
|                                 |         |              | Risk of bias       | Inconsistency             | Indirectness             | Imprecision           | Downgrades  |                                 |                                       |                                                    |                      |
| <b>Blood lipids</b>             |         |              |                    |                           |                          |                       |             |                                 |                                       |                                                    |                      |
| <i>LDL-C</i> , mmol/L           | 5       | RCTs         | not serious        | serious <sup>1</sup>      | not serious              | serious <sup>2</sup>  | not serious | -0.26 [-0.52, -0.00], p=0.050   | Small important effect                | LOW                                                |                      |
| <i>Non-HDL-C</i> , mmol/L       | 4       | RCTs         | not serious        | serious <sup>3</sup>      | not serious              | not serious           | not serious | -0.69 [-0.90, -0.48], p<0.0001  | Large effect                          | MODERATE                                           |                      |
| <i>HDL-C</i> , mmol/L           | 5       | RCTs         | not serious        | not serious <sup>4</sup>  | not serious              | not serious           | not serious | -0.03 [-0.10, 0.03], p=0.35     | No effect                             | HIGH                                               |                      |
| <i>Triglycerides</i> , mmol/L   | 5       | RCTs         | not serious        | not serious               | not serious              | serious <sup>5</sup>  | not serious | -0.05 [-0.14, 0.05], p=0.34     | No effect                             | MODERATE                                           |                      |
| <i>ApoB</i> , g/L               | 2       | RCTs         | not serious        | serious <sup>6</sup>      | not serious <sup>7</sup> | not serious           | not serious | -0.15 [-0.19, -0.11], p<0.0001  | Moderate effect                       | MODERATE                                           |                      |
| <b>Glycemic control</b>         |         |              |                    |                           |                          |                       |             |                                 |                                       |                                                    |                      |
| <i>HbA1c</i> , %                | 1       | RCTs         | not serious        | not serious <sup>8</sup>  | serious <sup>9</sup>     | not serious           | not serious | 0.01 [-0.06, 0.08], p=0.79      | No effect                             | MODERATE                                           |                      |
| <i>Fasting glucose</i> , mmol/L | 5       | RCTs         | not serious        | not serious               | not serious              | not serious           | not serious | -0.04 [-0.10, 0.02], p=0.46     | No effect                             | HIGH                                               |                      |
| <i>Fasting insulin</i> , pmol/L | 4       | RCTs         | not serious        | not serious               | not serious              | serious <sup>10</sup> | not serious | -7.83 [-12.26, -3.39], p=0.0005 | Small important effect                | MODERATE                                           |                      |
| <b>Adiposity</b>                |         |              |                    |                           |                          |                       |             |                                 |                                       |                                                    |                      |
| <i>Body weight</i> , kg         | 6       | RCTs         | not serious        | serious <sup>11</sup>     | not serious              | not serious           | not serious | -2.00 [-3.24, -0.75], p=0.002   | Moderate effect                       | MODERATE                                           |                      |
| <i>BMI</i> , kg/m <sup>2</sup>  | 4       | RCTs         | not serious        | not serious               | not serious              | not serious           | not serious | -0.98 [-1.19, -0.77], p<0.0001  | Small important effect                | HIGH                                               |                      |
| <i>Waist circumference</i> , cm | 4       | RCTs         | not serious        | not serious <sup>12</sup> | not serious              | serious <sup>13</sup> | not serious | -1.32 [-2.20, -0.43], p=0.003   | Trivial effect                        | MODERATE                                           |                      |
| <b>Blood pressure</b>           |         |              |                    |                           |                          |                       |             |                                 |                                       |                                                    |                      |
| <i>Systolic</i> , mmHg          | 4       | RCTs         | not serious        | not serious               | not serious              | serious <sup>14</sup> | not serious | -3.35 [-5.12, -1.59], p=0.0002  | Small important effect                | MODERATE                                           |                      |
| <i>Diastolic</i> , mmHg         | 4       | RCTs         | not serious        | not serious               | not serious              | serious <sup>15</sup> | not serious | -1.50 [-2.62, -0.37], p=0.009   | Trivial effect                        | MODERATE                                           |                      |
| <b>Inflammation</b>             |         |              |                    |                           |                          |                       |             |                                 |                                       |                                                    |                      |
| <i>CRP</i> , nmol/L             | 5       | RCTs         | not serious        | not serious <sup>16</sup> | not serious              | serious <sup>17</sup> | not serious | -1.91 [-6.37, 2.55], p=0.4      | No effect                             | MODERATE                                           |                      |

Apo-B, apolipoprotein-B; BMI, body mass index; CI, confidence interval; CRP, c-reactive protein; HbA1c, hemoglobin A1c; LDL-C, low density lipoprotein cholesterol; HDL-C, high density lipoprotein cholesterol; MD, mean difference; N/A, not applicable; Non-HDL-C, non-high density lipoprotein cholesterol; RCTs, randomized controlled trials, Small important: quantitative small but important association; Trivial: quantitative small but biologically/clinical unimportant association  
<sup>a</sup>No downgrades were made for publication bias, as publication bias could not be assessed due to lack of power for assessing funnel plot asymmetry and small study effects (<10 trials included in the meta-analysis).

<sup>b</sup> We used prespecified MIDDs to interpret the magnitude of the effect of the pooled estimate with effect size language defined by GRADE. MIDDs for RCT outcomes were: 0.1 mmol/L for LDL-C, non-HDL-C, HDL-C, and TG [50-52]; 0.04 g/L for ApoB; 0.3% for HbA1c; 0.5 mmol/L for fasting blood glucose[53], 5 pmol/L for fasting insulin; 0.5 kg for body weight[54, 55]; 0.2 kg/m<sup>2</sup> for BMI; 2 cm for WC; 2 mmHg for SBP and DBP[56]; and 0.5 mg/L for CRP[57, 58]), and publication bias (significant detection of small-study effects)

<sup>6</sup> Since all included trials were randomized controlled trials, the certainty of the evidence was graded as high for all outcomes by default and then downgraded or upgraded based on pre-specified criteria. Criteria for downgrades included risk of bias (downgraded if the majority of trials were considered to be at high risk of bias by the Cochrane ROB tool); inconsistency (downgraded if there was substantial unexplained heterogeneity [ $I^2 \geq 50\%$ ,  $pQ < 0.10$ ]; indirectness (downgraded if there were factors absent or present relating to the participants, interventions, or outcomes that limited the generalizability of the results); imprecision (downgraded if the 95% confidence interval crossed the minimally important difference [MID] as in b; and publication bias (downgraded if there is evidence of publication bias based on funnel plot asymmetry and/or significant Egger's or Begg's tests ( $p < 0.10$ ) with confirmation by adjustment by Duval and Tweedie trim-and-fill analysis).

<sup>1</sup> Downgrade for serious inconsistency for the effect of Nordic diets on LDL-C, as there was evidence of substantial heterogeneity ( $I^2 = 89\%$  and  $P < 0.001$ ).

<sup>2</sup> Downgrade for serious imprecision for the effect of Nordic diets on LDL-C, as the 95% CIs (-0.52, -0.00 mmol/L) overlap with the minimally important difference for clinical benefit (0.1 mmol/L).

<sup>3</sup> Downgrade for serious inconsistency for the effect of Nordic diets on Non-HDL-C, as there was evidence of substantial heterogeneity ( $I^2 = 91\%$  and  $P < 0.001$ ), and although removal of Adamsson et al. explained the heterogeneity ( $I^2 = 0\%$ ,  $PQ = 1$ ), the magnitude of the pooled effect estimate was decreased and significance was lost (MD = -0.14 mmol/L, 95% CI: -0.48, 0.20,  $P = 0.42$ ).

<sup>4</sup> No downgrade for serious inconsistency for the effect of Nordic diets on HDL-C, as although there was evidence of substantial heterogeneity ( $I^2 = 80\%$  and  $P = 0.0005$ ), removal of Adamsson et al. explained the heterogeneity ( $I^2 = 32\%$ ,  $P = 0.22$ ), without altering the direction, magnitude, or significance of the pooled effect estimate (MD = -0.00 mmol/L, 95% CI: -0.04, 0.04,  $P = 0.92$ ).

<sup>5</sup> Downgrade for serious imprecision for the effect of Nordic diets on triglycerides, as the 95% CIs (-0.14, 0.05 mmol/L) overlap with the minimally important difference for clinical benefit (0.1 mmol/L).

<sup>6</sup> Downgrade for serious inconsistency for the effect of Nordic diets on ApoB as there was evidence of substantial heterogeneity ( $I^2 = 96\%$  and  $P < 0.001$ ).

<sup>7</sup> No downgrade for indirectness for the effect of Nordic dietary patterns on apoB, as although there were only 2 small trials which may not have been representative, the direction, magnitude of the effect was similar to that of other related apolipoprotein-containing particles, non-HDL-C and LDL-C, both of which demonstrated significant reductions. in 4 and 5 trials, respectively.

<sup>8</sup> Inconsistency could not be assessed as only one trial comparison was available.

<sup>9</sup> Downgrade for serious indirectness for the effect of Nordic dietary patterns on HbA1c, as only 1 trial comparison was available so replication of the results across different trial conditions and Nordic dietary patterns cannot be confirmed.

<sup>10</sup> Downgrade for serious imprecision for the effect of Nordic diets on fasting insulin as the 95% CIs (-12.26, -3.39 pmol/L) overlap with the minimally important difference for clinical benefit (5 pmol/L).

<sup>11</sup> Downgrade for serious inconsistency for the effect of Nordic diets on body weight as there was evidence of substantial heterogeneity ( $I^2 = 88\%$  and  $P < 0.001$ ).

<sup>12</sup> No downgrade for serious inconsistency for the effect of Nordic diets on waist circumference, as although there was evidence of substantial heterogeneity ( $I^2 = 71\%$  and  $PQ = 0.02$ ), removal of Gotfredsen et al. 2020 explained the heterogeneity ( $I^2 = 0\%$ ,  $PQ = 0.60$ ) without altering the direction, magnitude, or significance of the pooled effect estimate (MD = -2.49 cm, 95% CI: -3.66, -1.33,  $PMD < 0.001$ ).

<sup>13</sup> Downgrade for serious imprecision for the effect of Nordic diets on waist circumference as the 95% CIs (-3.36, -1.09 cm) overlap with the minimally important difference for clinical benefit (2 cm).

<sup>14</sup> Downgrade for serious imprecision for the effect of Nordic diets on systolic blood pressure as the 95% CIs (-5.12, -1.59 mmHg) overlap with the minimally important difference for clinical benefit (2 mmHg).

<sup>15</sup> Downgrade for serious imprecision for the effect of Nordic diets on diastolic blood pressure as the 95% CIs (-2.62, -0.37 mmHg) overlap with the minimally important difference for clinical benefit (2 mmHg).

<sup>16</sup> No downgrade for serious inconsistency for the effect of Nordic dietary patterns on CRP, as although there was evidence of substantial heterogeneity ( $I^2 = 69\%$  and  $P = 0.01$ ), removal of Poulsen et al. explained the heterogeneity ( $I^2 = 0\%$ ,  $P = 0.51$ ), without altering the direction, magnitude, or significance of the pooled effect estimate (MD = 0.02 nmol/L, 95% CI: -0.43, 0.39 nmol/L,  $PMD = 0.92$ ).

<sup>17</sup> Downgrade for serious imprecision for the effect of Nordic diets on CRP as the 95% CIs (-6.37, 2.55 nmol/L) overlap with the minimally important difference for clinical benefit (4.8 nmol/L).

**ESM Table 15. NutriGRADE assessment for the effect of Nordic dietary patterns and cardiometabolic risk factors in RCTs**

| Outcome                 | Trial comparisons, <i>n</i> | Trial size | Quality assessment (points; Max 10)                                                          |                                                      |                                 |                   |                               |                                                               |              | Effect<br><br>Pooled Effect Estimate RR (95% CI) | Score<br><br>Meta-evidence (Final point) |
|-------------------------|-----------------------------|------------|----------------------------------------------------------------------------------------------|------------------------------------------------------|---------------------------------|-------------------|-------------------------------|---------------------------------------------------------------|--------------|--------------------------------------------------|------------------------------------------|
|                         |                             |            | Risk of bias, study quality and study limitations<br><br>Based upon ROB from suppl. Figure 6 | Precision                                            | Heterogeneity                   | Directness        | Publication Bias              | Funding Bias                                                  | Study design |                                                  |                                          |
| <b>LDL-C</b>            | 5                           | 606        | 2                                                                                            | 0                                                    | 0                               | 0                 | 0                             | 0                                                             | 2            | -0.26 [-0.52, -0.00]                             | 4<br>Low                                 |
|                         |                             |            |                                                                                              | 400-2000 participants but 95% CI includes null value | 2-5 studies x multiply by 0     | Surrogate markers | Publication bias not assessed | At least one author has conflict interest or industry funding |              |                                                  |                                          |
| <b>Non-HDL-C</b>        | 4                           | 374        | 2                                                                                            | 0                                                    | 0                               | 0                 | 0                             | 0                                                             | 2            | -0.69 [-0.9-, -0.48]                             | 4<br>Low                                 |
|                         |                             |            |                                                                                              | <400 participants                                    | 2-5 studies x multiply by 0     | Surrogate markers | <5 studies                    | At least one author has conflict interest or industry funding |              |                                                  |                                          |
| <b>HDL-C</b>            | 5                           | 606        | 2                                                                                            | 0                                                    | 0                               | 0                 | 0                             | 0                                                             | 2            | -0.03 [-0.10, 0.03]                              | 4<br>Low                                 |
|                         |                             |            |                                                                                              | 400-2000 participants but 95% CI includes null value | 2-5 studies x multiply by 0     | Surrogate markers | Publication bias not assessed | At least one author has conflict interest or industry funding |              |                                                  |                                          |
| <b>Triglycerides</b>    | 5                           | 606        | 2                                                                                            | 0                                                    | 0                               | 0                 | 0                             | 0                                                             | 2            | -0.05 [-0.14, 0.05]                              | 4<br>Low                                 |
|                         |                             |            |                                                                                              |                                                      | 2-5 studies x multiply by 0     | Surrogate markers | Publication bias not assessed | At least one author has conflict interest or industry funding |              |                                                  |                                          |
| <b>ApoB</b>             | 3                           | 262        | 2                                                                                            | 0                                                    | 0                               | 0                 | 0                             | 0                                                             | 2            | -0.15 [-0.19, -0.11]                             | 4<br>Low                                 |
|                         |                             |            |                                                                                              | <400 participants                                    | 2-5 studies x multiply by 0     | Surrogate markers | <5 studies                    | At least one author has conflict interest or industry funding |              |                                                  |                                          |
| <b>HbA<sub>1c</sub></b> | 1                           | 145        | 2                                                                                            | 0                                                    | 0                               | 0                 | 0                             | 1                                                             | 2            | 0.01[-0.06,0.08]                                 | 5<br>Low                                 |
|                         |                             |            |                                                                                              | <400 participants                                    | Only 1 study, No chi2 performed | Surrogate markers | <5 studies                    |                                                               |              |                                                  |                                          |
| <b>Fasting glucose</b>  | 5                           | 706        | 2                                                                                            | 0                                                    | 0                               | 0                 | 0                             | 0                                                             | 2            | -0.04 [-0.10, 0.02]                              | 4<br>Low                                 |
|                         |                             |            |                                                                                              | 400-2000 participants but 95% CI includes null value | 2-5 studies x multiply by 0     | Surrogate markers | Publication bias not assessed | At least one author has conflict interest or industry funding |              |                                                  |                                          |

|                                 |   |     |   |                                                      |                             |                   |                               |                                                               |   |                       |            |
|---------------------------------|---|-----|---|------------------------------------------------------|-----------------------------|-------------------|-------------------------------|---------------------------------------------------------------|---|-----------------------|------------|
| <b>Fasting insulin</b>          | 4 | 393 | 2 | 0                                                    | 0                           | 0                 | 0                             | 0                                                             | 2 | -7.83 [-12.26, -3.39] | 4<br>Low   |
|                                 |   |     |   | <400 participants                                    | 2-5 studies x multiply by 0 | Surrogate markers | <5 studies                    | At least one author has conflict interest or industry funding |   |                       |            |
| <b>Body weight</b>              | 6 | 706 | 2 | 1                                                    | 0.2                         | 0                 | 0                             | 0                                                             | 2 | -2.00 [-3.24, -0.75]  | 5.5<br>Low |
|                                 |   |     |   |                                                      | I2>40%                      | Surrogate markers | Publication bias not assessed | At least one author has conflict interest or industry funding |   |                       |            |
| <b>BMI</b>                      | 4 | 393 | 2 | 0                                                    | 0                           | 0                 | 0                             | 0                                                             | 2 | -0.98 [-1.19, -0.77]  | 4<br>Low   |
|                                 |   |     |   | <400 participants                                    | 2-5 studies x multiply by 0 | Surrogate markers | <5 studies                    | At least one author has conflict interest or industry funding |   |                       |            |
| <b>Waist circumference</b>      | 4 | 454 | 2 | 1                                                    | 0                           | 0                 | 0                             | 0                                                             | 2 | -1.32 [-2.20, -0.43]  | 5<br>Low   |
|                                 |   |     |   |                                                      | 2-5 studies x multiply by 0 | Surrogate markers | <5 studies                    | At least one author has conflict interest or industry funding |   |                       |            |
| <b>Systolic blood pressure</b>  | 4 | 533 | 2 | 1                                                    | 0                           | 0                 | 0                             | 0                                                             | 2 | -3.35 [-5.12, -1.59]  | 5<br>Low   |
|                                 |   |     |   |                                                      | 2-5 studies x multiply by 0 | Surrogate markers | <5 studies                    | At least one author has conflict interest or industry funding |   |                       |            |
| <b>Diastolic blood pressure</b> | 4 | 533 | 2 | 1                                                    | 0                           | 0                 | 0                             | 0                                                             | 2 | -1.50 [-2.62, -0.37]  | 5<br>Low   |
|                                 |   |     |   |                                                      | 2-5 studies x multiply by 0 | Surrogate markers | <5 studies                    | At least one author has conflict interest or industry funding |   |                       |            |
| <b>CRP</b>                      | 5 | 606 | 2 | 0                                                    | 0                           | 0                 | 0                             | 0                                                             | 2 | -1.91 [-6.37, 2.55]   | 4<br>Low   |
|                                 |   |     |   | 400-2000 participants but 95% CI includes null value | 2-5 studies x multiply by 0 | Surrogate markers | Publication bias not assessed | At least one author has conflict interest or industry funding |   |                       |            |

Reference: Schwingshackl L, Knüppel S, Schwedhelm C, Hoffmann G, Missbach B, Stelmach-Mardas M, Dietrich S, Eichelmann F, Kontopantelis E, Iqbal K, Aleksandrova K, Lorkowski S, Leitzmann MF, Kroke A, Boeing H. Perspective: NutriGrade: A Scoring System to Assess and Judge the Meta-Evidence of Randomized Controlled Trials and Cohort Studies in Nutrition Research. *Adv Nutr* 2016;7:994-

**SUPPLEMENTARY FIGURES**

**ESM Fig. 1. Forest plot of the association between the Nordic dietary patterns and CVD incidence.**

RR, risk ratio. Pooled risk estimate is represented by the diamond. Values of  $I^2 \geq 50\%$  indicate substantial heterogeneity. Values greater than 1.0 indicate a harmful association.

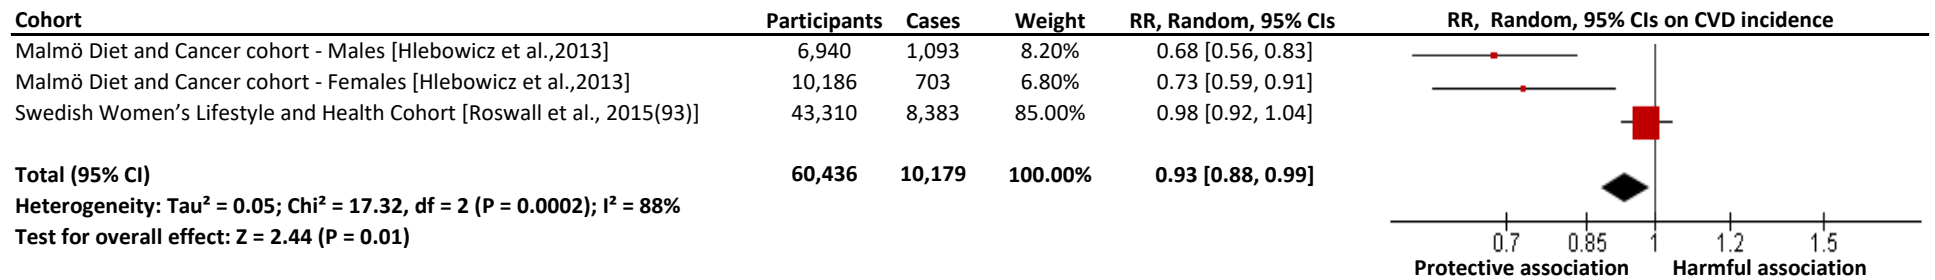



**ESM Fig. 2. Forest plot of the association between the Nordic dietary patterns and CVD mortality.**

RR, risk ratio. Pooled risk estimate is represented by the diamond. Values of  $I^2 \geq 50\%$  indicate substantial heterogeneity. Values greater than 1.0 indicate a harmful association.

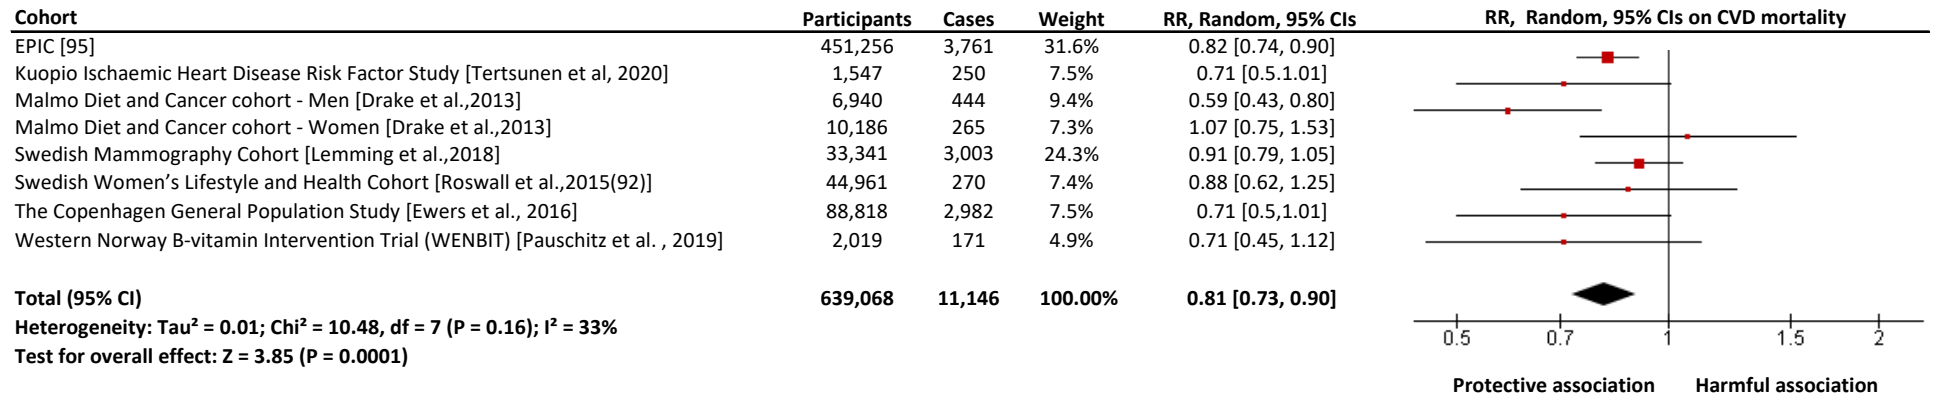

**ESM Fig. 3. Forest plot of the association between the Nordic dietary patterns and CHD incidence.**

RR, risk ratio. Pooled risk estimate is represented by the diamond. Values of  $I^2 \geq 50\%$  indicate substantial heterogeneity. Values greater than 1.0 indicate a harmful association.

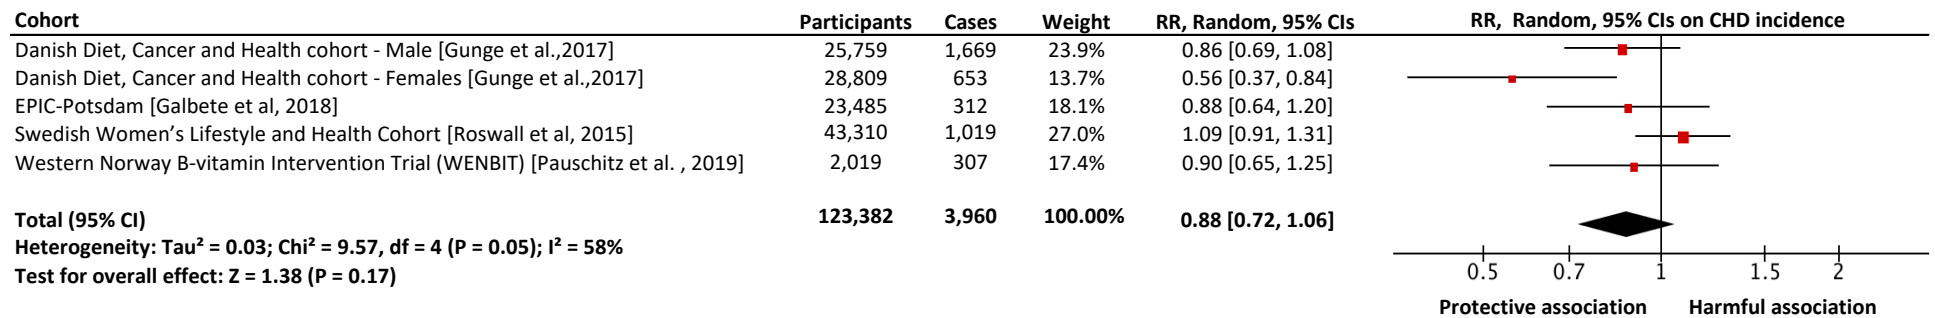

**ESM Fig. 4. Forest plot of the association between the Nordic dietary patterns and stroke incidence.**

RR, risk ratio. Pooled risk estimate is represented by the diamond. Values of  $I^2 \geq 50\%$  indicate substantial heterogeneity. Values greater than 1.0 indicate a harmful association.

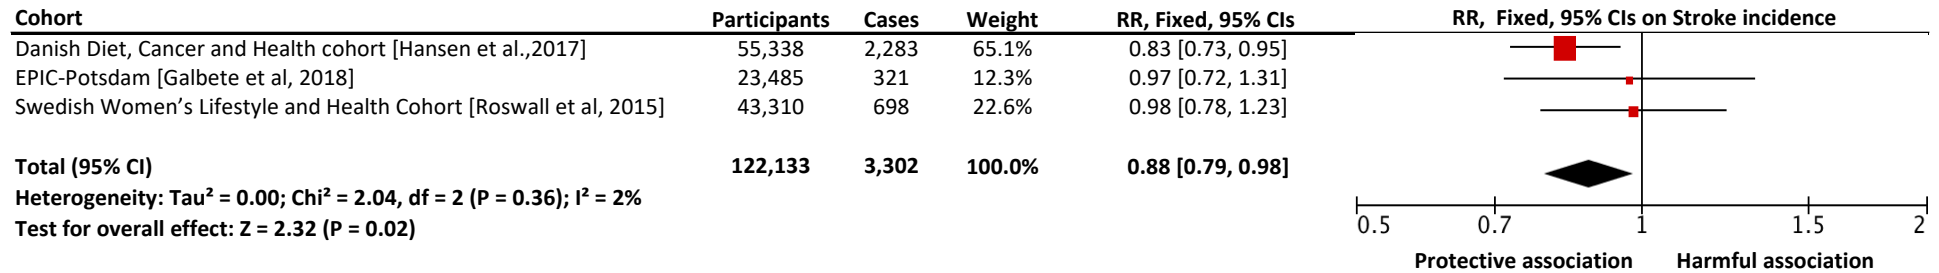

**ESM Fig. 5. Forest plot of the association between the Nordic dietary patterns and type 2 diabetes mellitus incidence.**

LogRR, logarithmic risk ratio. Pooled risk estimate is represented by the diamond. Values of  $I^2 \geq 50\%$  indicate substantial heterogeneity. Values greater than 1.0 indicate a harmful association.

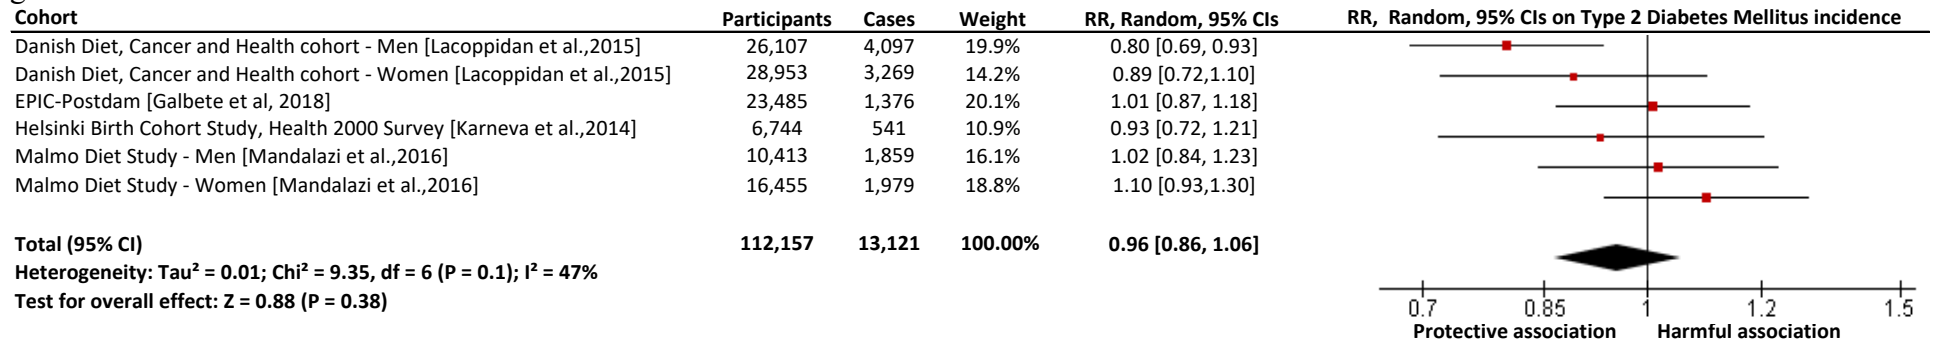

**ESM Fig. 6. Risk of bias of included RCTs.**

Colored bars represent the proportion of studies assessed and circles represent the individual RCT. The colors represent low (green), unclear (yellow) or high (red) risk of bias for the 5 domains of bias above according to criteria set by the Cochrane Risk of Bias tool.

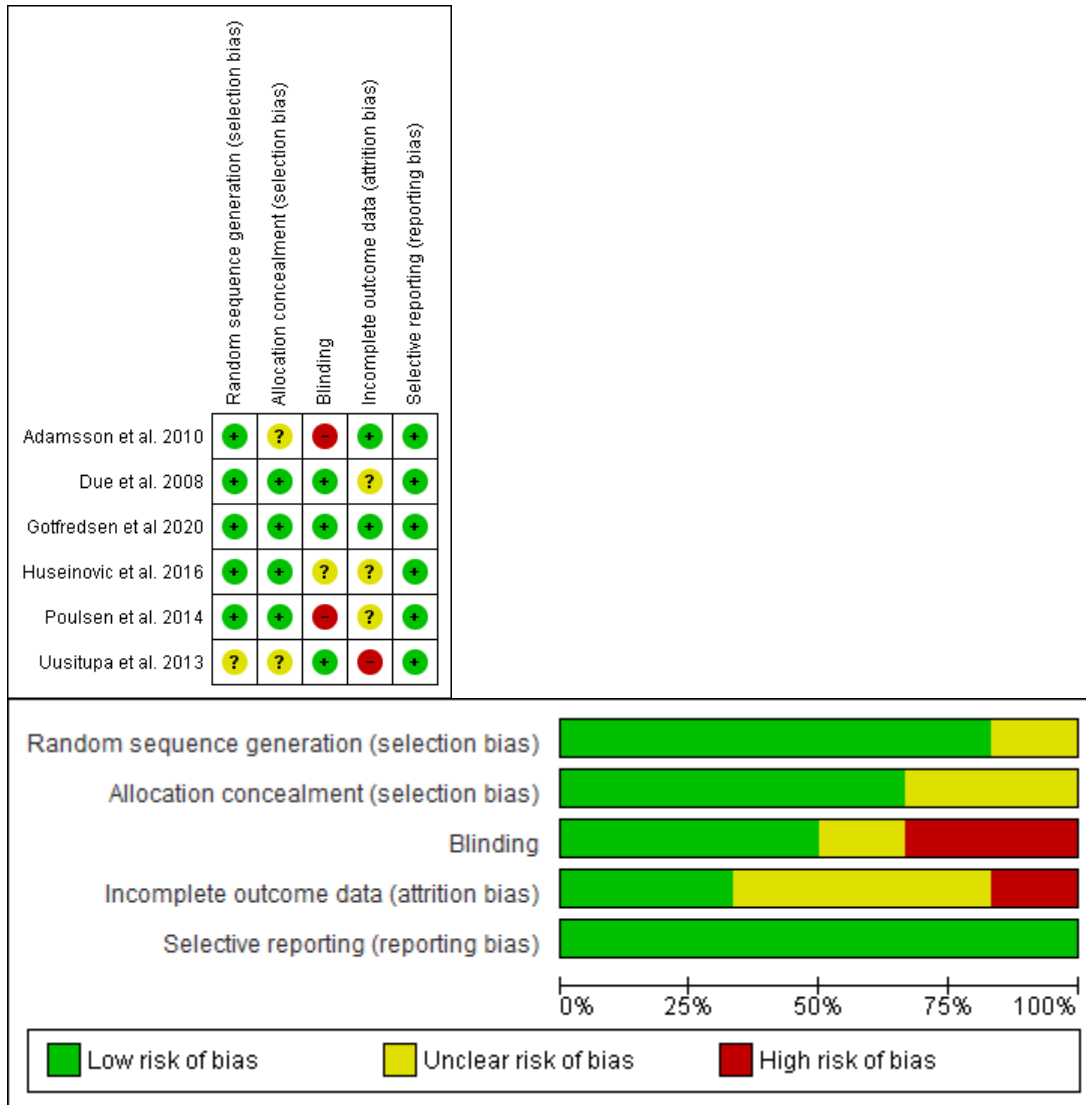

**ESM Fig. 7. Forest plot of randomized controlled trials assessing the effect of Nordic diets on LDL-C.**

Risk of bias: A=random sequence generation; B=allocation concealment; C=blinding of participants and personnel; D=incomplete outcome data; E=selective reporting. Pooled effect estimates for each subgroup and overall effect are represented by the diamonds. Data are expressed as weighted mean differences with 95% CIs using the generic inverse-variance method modelled by random effects. Paired analyses were applied to all crossover trials. Inter-study heterogeneity was assessed using the Cochran Q statistic and quantified using the  $I^2$  statistic, with significance set at  $P < 0.10$  and  $I^2 > 50\%$  considered to be evidence of substantial heterogeneity.

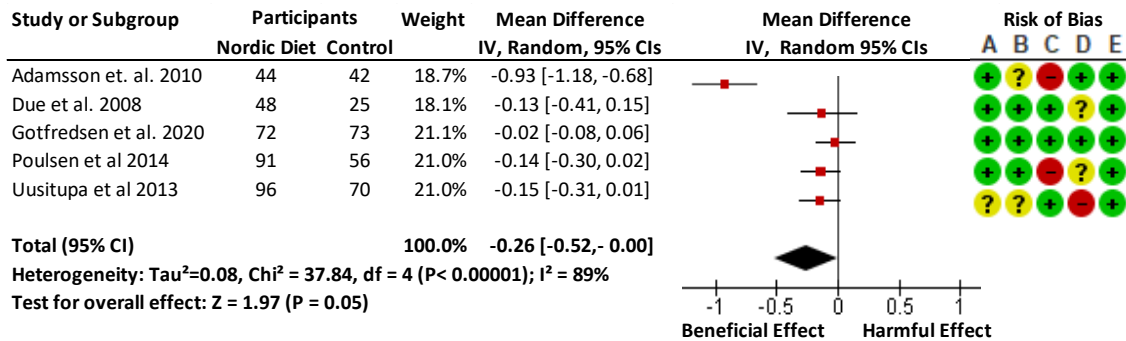

**ESM Fig. 8. Forest plot of randomized controlled trials assessing the effect of Nordic dietary patterns on BMI.**

Risk of bias: A=random sequence generation; B=allocation concealment; C=blinding of participants and personnel; D=incomplete outcome data; E=selective reporting. Pooled effect estimates for each subgroup and overall effect are represented by the diamonds. Data are expressed as weighted mean differences with 95% CIs using the generic inverse-variance method modelled by random effects. Paired analyses were applied to all crossover trials. Interstudy heterogeneity was assessed using the Cochran Q statistic and quantified using the  $I^2$  statistic, with significance set at  $P < 0.10$  and  $I^2 > 50\%$  considered to be evidence of substantial heterogeneity.

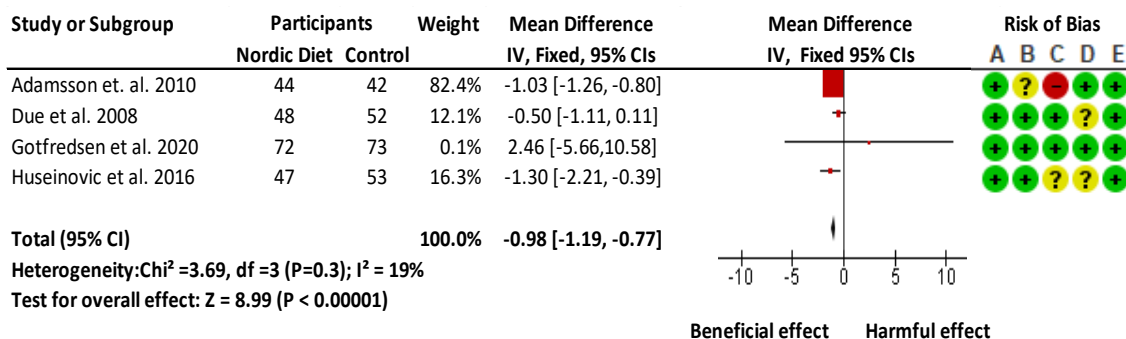

**ESM Fig. 9. Forest plot of randomized controlled trials assessing the effect of Nordic dietary patterns on body weight.**

Risk of bias: A=random sequence generation; B=allocation concealment; C=blinding of participants and personnel; D=incomplete outcome data; E=selective reporting. Pooled effect estimates for each subgroup and overall effect are represented by the diamonds. Data are expressed as weighted mean differences with 95% CIs using the generic inverse-variance method modelled by random effects. Paired analyses were applied to all crossover trials. Inter-study heterogeneity was assessed using the Cochran Q statistic and quantified using the I<sup>2</sup> statistic, with significance set at P<0.10 and I<sup>2</sup>>50% considered to be evidence of substantial heterogeneity.

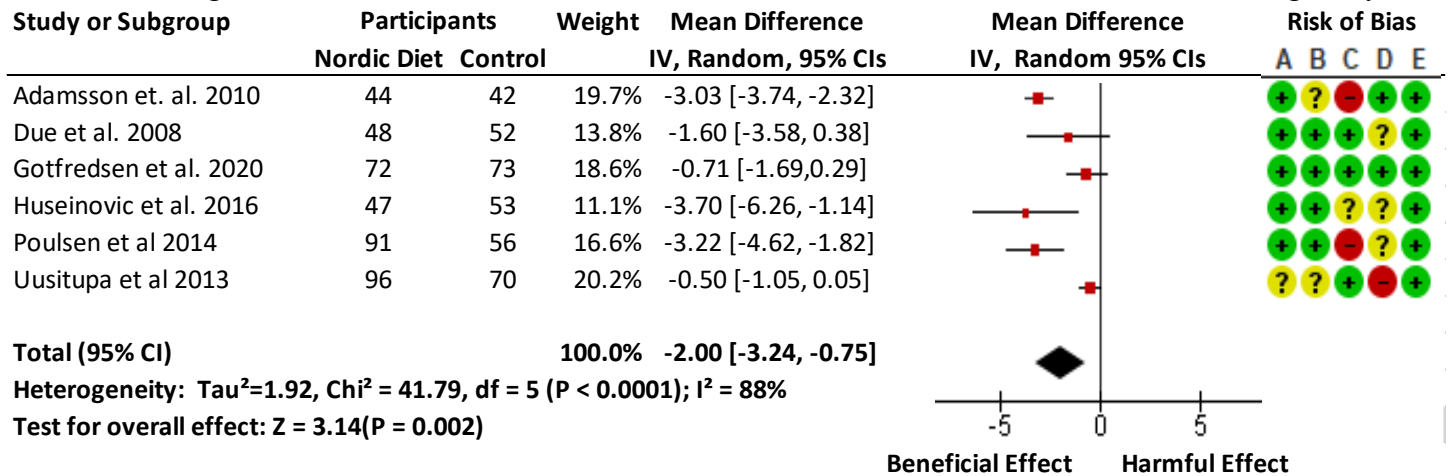

**ESM Fig. 10. Forest plot of randomized controlled trials assessing the effect of Nordic dietary patterns on waist circumference.**

Risk of bias: A=random sequence generation; B=allocation concealment; C=blinding of participants and personnel; D=incomplete outcome data; E=selective reporting. Pooled effect estimates for each subgroup and overall effect are represented by the diamonds. Data are expressed as weighted mean differences with 95% CIs using the generic inverse-variance method modelled by random effects. Paired analyses were applied to all crossover trials. Inter-study heterogeneity was assessed using the Cochran Q statistic and quantified using the I<sup>2</sup> statistic, with significance set at P<0.10 and I<sup>2</sup>>50% considered to be evidence of substantial heterogeneity.

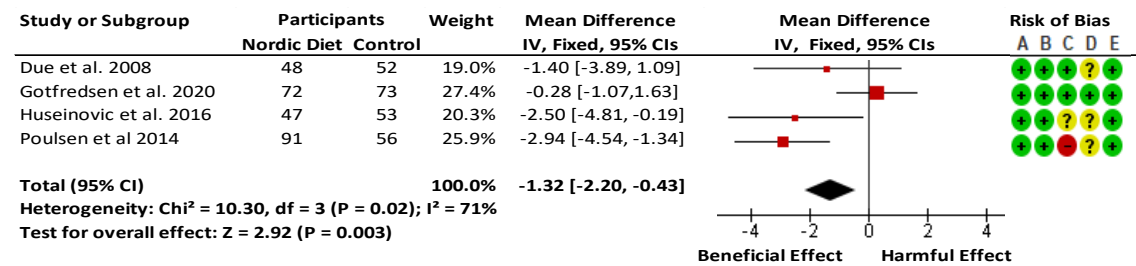

**ESM Fig. 11. Forest plot of randomized controlled trials assessing the effect of Nordic dietary patterns on HDL-C.**

Risk of bias: A=random sequence generation; B=allocation concealment; C=blinding of participants and personnel; D=incomplete outcome data; E=selective reporting. Pooled effect estimates for each subgroup and overall effect are represented by the diamonds. Data are expressed as weighted mean differences with 95% CIs using the generic inverse-variance method modelled by random effects. Paired analyses were applied to all crossover trials. Inter-study heterogeneity was assessed using the Cochran Q statistic and quantified using the  $I^2$  statistic, with significance set at  $P < 0.10$  and  $I^2 > 50\%$  considered to be evidence of substantial heterogeneity.

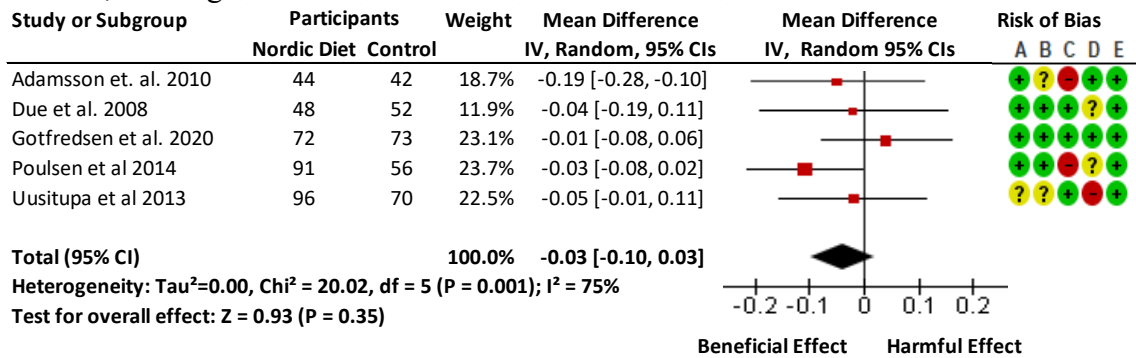

**ESM Fig. 12. Forest plot of randomized controlled trials assessing the effect of Nordic dietary patterns on Non-HDL-C.**

Risk of bias: A=random sequence generation; B=allocation concealment; C=blinding of participants and personnel; D=incomplete outcome data; E=selective reporting. Pooled effect estimates for each subgroup and overall effect are represented by the diamonds. Data are expressed as weighted mean differences with 95% CIs using the generic inverse-variance method modelled by random effects. Paired analyses were applied to all crossover trials. Inter-study heterogeneity was assessed using the Cochran Q statistic and quantified using the  $I^2$  statistic, with significance set at  $P < 0.10$  and  $I^2 > 50\%$  considered to be evidence of substantial heterogeneity.

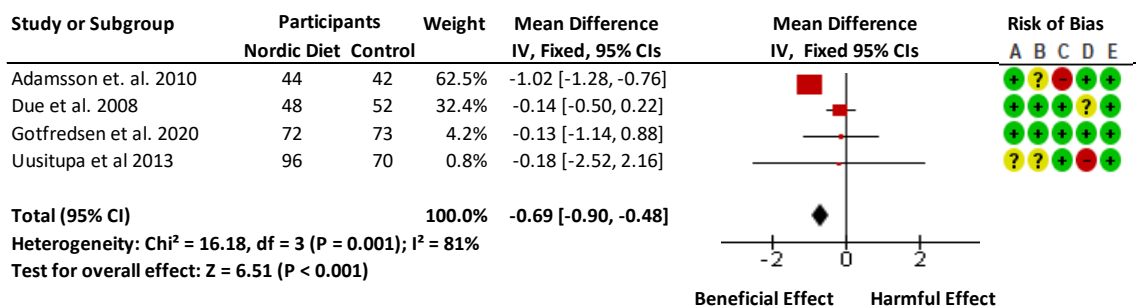

**ESM Fig. 13. Forest plot of randomized controlled trials assessing the effect of Nordic dietary patterns on triglycerides.**

Risk of bias: A=random sequence generation; B=allocation concealment; C=blinding of participants and personnel; D=incomplete outcome data; E=selective reporting. Pooled effect estimates for each subgroup and overall effect are represented by the diamonds. Data are expressed as weighted mean differences with 95% CIs using the generic inverse-variance method modelled by random effects. Paired analyses were applied to all crossover trials. Inter-study heterogeneity was assessed using the Cochran Q statistic and quantified using the I<sup>2</sup> statistic, with significance set at P<0.10 and I<sup>2</sup>>50% considered to be evidence of substantial heterogeneity.

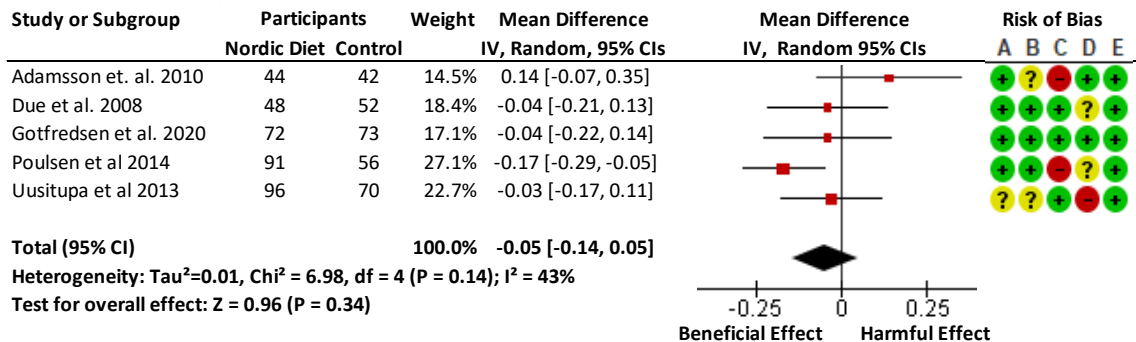

**ESM Fig. 14. Forest plot of randomized controlled trials assessing the effect of Nordic dietary patterns on ApoB.**

Risk of bias: A=random sequence generation; B=allocation concealment; C=blinding of participants and personnel; D=incomplete outcome data; E=selective reporting. Pooled effect estimates for each subgroup and overall effect are represented by the diamonds. Data are expressed as weighted mean differences with 95% CIs using the generic inverse-variance method modelled by random effects. Paired analyses were applied to all crossover trials. Inter-study heterogeneity was assessed using the Cochran Q statistic and quantified using the I<sup>2</sup> statistic, with significance set at P<0.10 and I<sup>2</sup>>50% considered to be evidence of substantial heterogeneity.

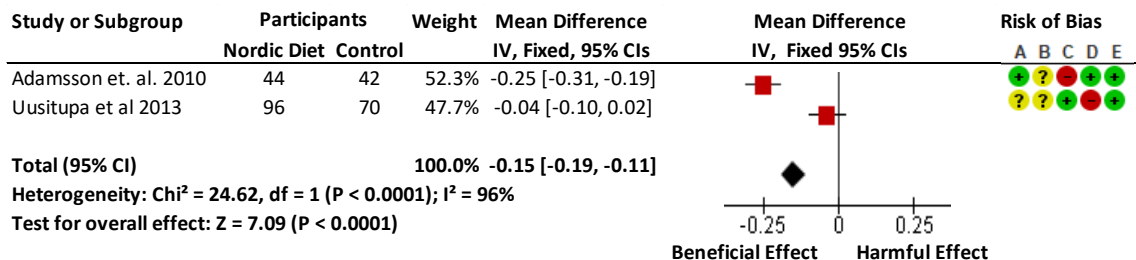

**ESM Fig. 15. Forest plot of randomized controlled trials assessing the effect of Nordic dietary patterns on systolic blood pressure.**

Risk of bias: A=random sequence generation; B=allocation concealment; C=blinding of participants and personnel; D=incomplete outcome data; E=selective reporting. Pooled effect estimates for each subgroup and overall effect are represented by the diamonds. Data are expressed as weighted mean differences with 95% CIs using the generic inverse-variance method modelled by random effects. Paired analyses were applied to all crossover trials. Inter-study heterogeneity was assessed using the Cochran Q statistic and quantified using the I<sup>2</sup> statistic, with significance set at P<0.10 and I<sup>2</sup>>50% considered to be evidence of substantial heterogeneity.

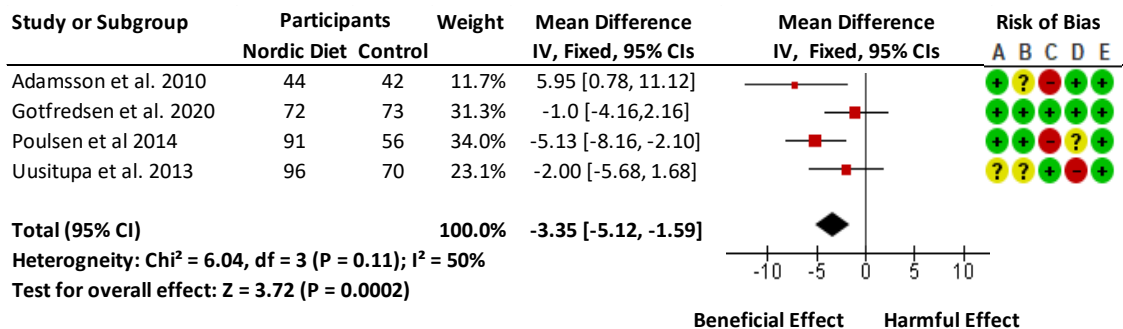

**ESM Fig. 16. Forest plot of randomized controlled trials assessing the effect of Nordic dietary patterns on diastolic blood pressure.**

Risk of bias: A=random sequence generation; B=allocation concealment; C=blinding of participants and personnel; D=incomplete outcome data; E=selective reporting. Pooled effect estimates for each subgroup and overall effect are represented by the diamonds. Data are expressed as weighted mean differences with 95% CIs using the generic inverse-variance method modelled by random effects. Paired analyses were applied to all crossover trials. Inter-study heterogeneity was assessed using the Cochran Q statistic and quantified using the I<sup>2</sup> statistic, with significance set at P<0.10 and I<sup>2</sup>>50% considered to be evidence of substantial heterogeneity.

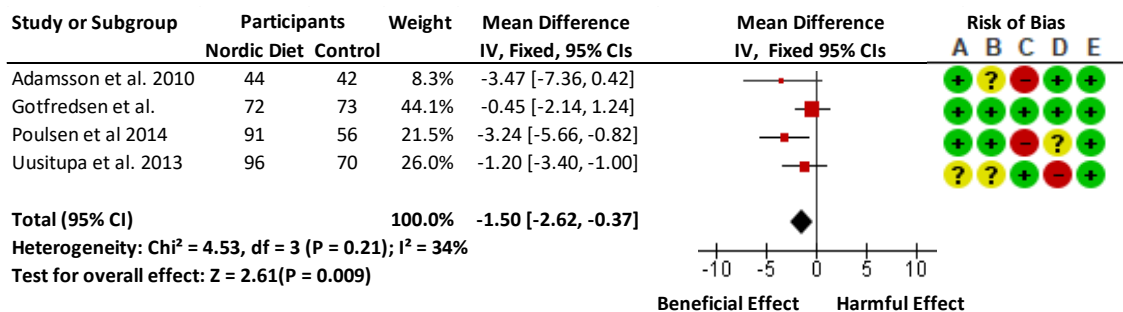



**ESM Fig. 17. Forest plot of randomized controlled trials assessing the effect of Nordic dietary patterns on fasting blood glucose.**

Risk of bias: A=random sequence generation; B=allocation concealment; C=blinding of participants and personnel; D=incomplete outcome data; E=selective reporting. Pooled effect estimate is represented by the diamond. Data are expressed as weighted mean differences with 95% CIs using the generic inverse-variance method modelled by fixed effects. Paired analyses were applied to all crossover trials. Inter-study heterogeneity was assessed using the Cochran Q statistic and quantified using the  $I^2$  statistic, with significance set at  $P < 0.10$  and  $I^2 > 50\%$  considered to be evidence of substantial heterogeneity.

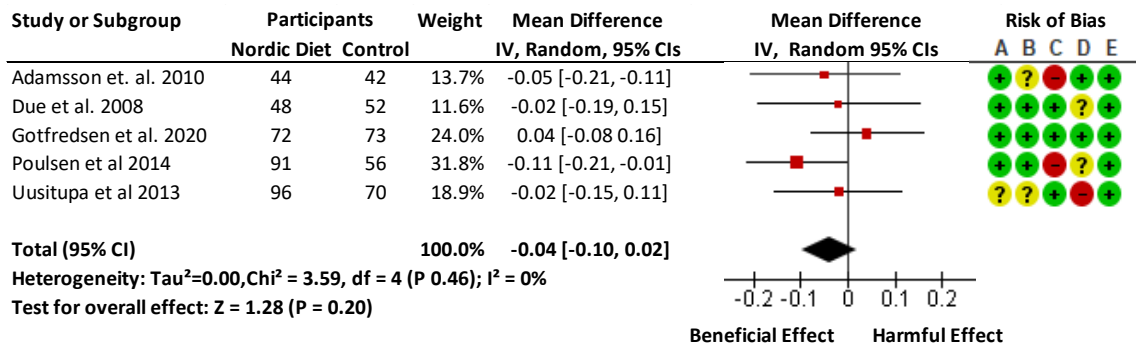

**ESM Fig. 18. Forest plot of randomized controlled trials assessing the effect of Nordic dietary patterns on fasting blood insulin.**

Risk of bias: A=random sequence generation; B=allocation concealment; C=blinding of participants and personnel; D=incomplete outcome data; E=selective reporting. Pooled effect estimate is represented by the diamond. Data are expressed as weighted mean differences with 95% CIs using the generic inverse-variance method modelled by fixed effects. Paired analyses were applied to all crossover trials. Inter-study heterogeneity was assessed using the Cochran Q statistic and quantified using the  $I^2$  statistic, with significance set at  $P < 0.10$  and  $I^2 > 50\%$  considered to be evidence of substantial heterogeneity.

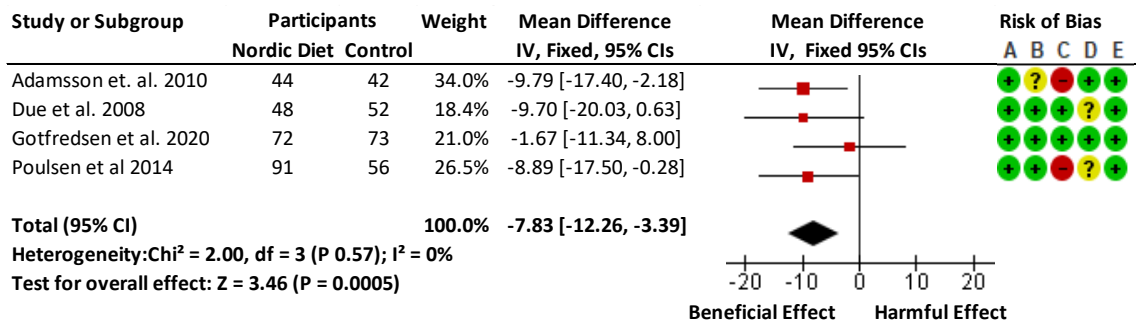

**ESM Fig. 19. Forest plot of randomized controlled trials assessing the effect of Nordic dietary patterns on HbA1c.**

Risk of bias: A=random sequence generation; B=allocation concealment; C=blinding of participants and personnel; D=incomplete outcome data; E=selective reporting. Pooled effect estimate is represented by the diamond. Data are expressed as weighted mean differences with 95% CIs using the generic inverse-variance method modelled by fixed effects. Paired analyses were applied to all crossover trials. Inter-study heterogeneity was assessed using the Cochran Q statistic and quantified using the  $I^2$  statistic, with significance set at  $P < 0.10$  and  $I^2 > 50\%$  considered to be evidence of substantial heterogeneity. The overall mean difference (MD) for HbA1c is 0.062 mmol/mol [-0.37, 0.50 mmol/mol] (MD 0.01 % [-0.06, 0.08]).

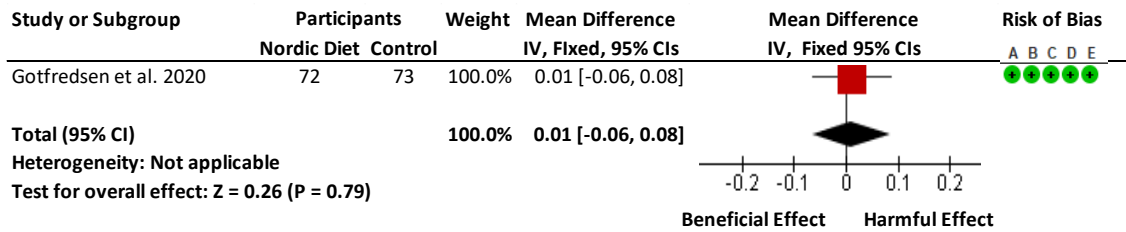

**ESM Fig. 20. Forest plot of randomized controlled trials assessing the effect of Nordic dietary patterns on inflammation.**

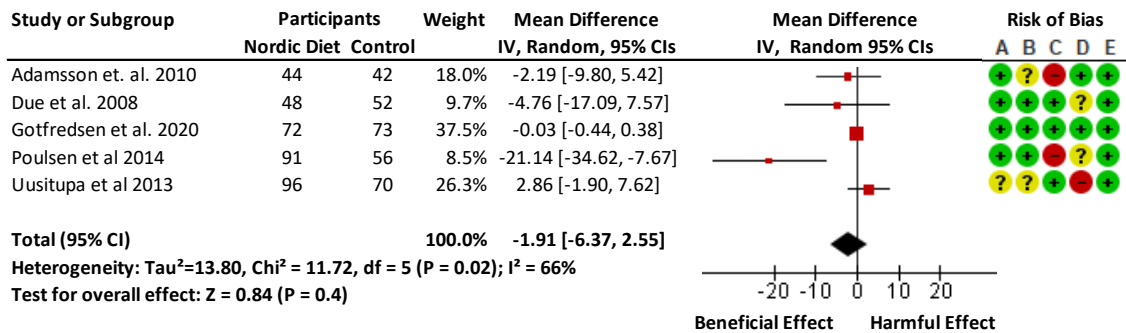

**ESM Fig. 21. Influence analysis plots of ad libitum randomized controlled trials assessing the effect of Nordic dietary patterns on adiposity markers.**

**Influence Analysis**  
Body Weight

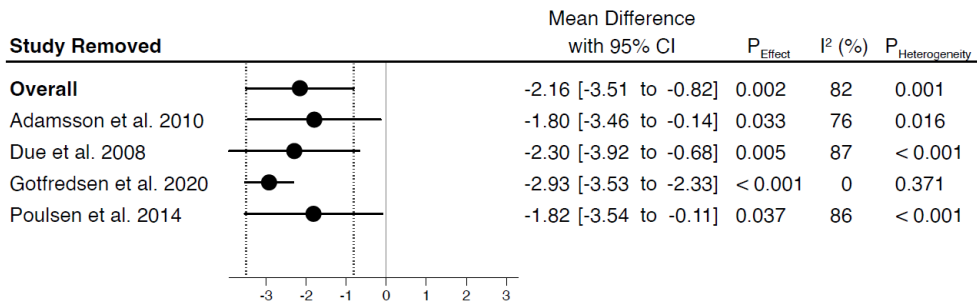

*Influence analysis: Removal of each study, one at a time and recalculation of the overall effect and heterogeneity*

**Influence Analysis**  
Body Mass Index

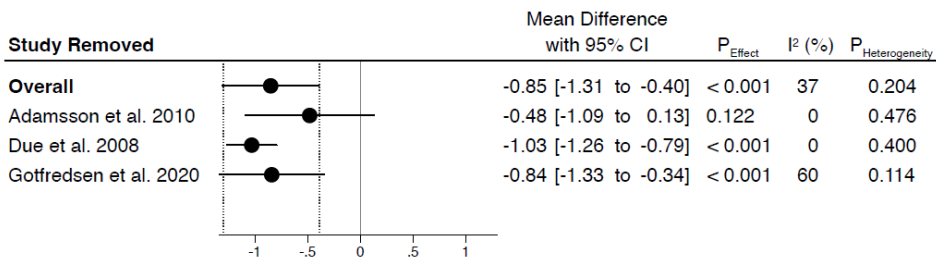

*Influence analysis: Removal of each study, one at a time and recalculation of the overall effect and heterogeneity*

**Influence Analysis**  
Waist Circumference

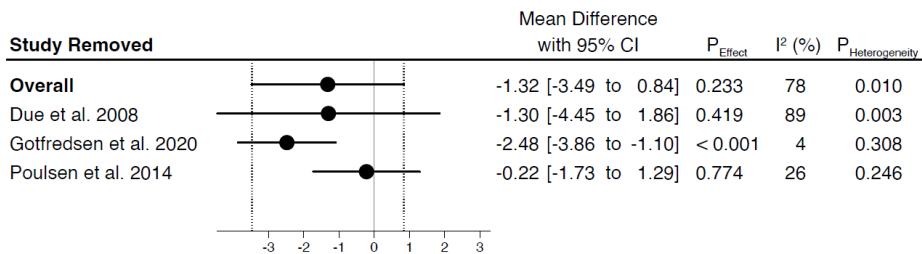

*Influence analysis: Removal of each study, one at a time and recalculation of the overall effect and heterogeneity*
